# Supplementary material for: A visible-light-induced “on–off” one-pot synthesis of 3-arylacetylene coumarins with AIE properties
Source: Royal Society of Chemistry journal article supplement (doi:10.1039/d0ob00479k), 2020-01-01
Supplement: d0ob00479k1.pdf [file d0ob00479k1.pdf]

## Supporting Information

### A visible-light-induced “on-off” one-pot synthesis of 3-arylacetylene coumarins with AIE properties

Xinjie Wu,<sup>a,‡</sup> Ming Jia,<sup>b,‡</sup> Mengmeng Huang,<sup>a,‡</sup> Jung Keun Kim,<sup>a</sup> Zheng Zhao,<sup>c</sup> Junkai Liu,<sup>c</sup> Jinhu Xi,<sup>a</sup> Yabo Li<sup>a,\*</sup> and Yangjie Wu<sup>a,\*</sup>

<sup>a</sup>College of Chemistry, Henan Key Laboratory of Chemical Biology and Organic Chemistry, Key Laboratory of Applied Chemistry of Henan Universities, Zhengzhou University, Zhengzhou 450052, P.R. China. E-mail: wyj@zzu.edu.cn, ybli@zzu.edu.cn.

<sup>b</sup>School of Materials Science and Engineering, Zhengzhou University, Zhengzhou 450052, P.R. China.

<sup>c</sup>Department of Chemistry, The Hong Kong University of Science and Technology, Hong Kong, P.R. China.

<sup>‡</sup>These authors contributed equally to this work.

## Table of contents

|                                                                                                                                     |            |
|-------------------------------------------------------------------------------------------------------------------------------------|------------|
| <b>1. General information .....</b>                                                                                                 | <b>S1</b>  |
| <b>2. UV/Vis absorption spectra, fluorescence emission spectra, measurement and calculation of fluorescence quantum yield .....</b> | <b>S1</b>  |
| <b>3. Photophysical properties of compounds 4a, 4e, 4h, 4n and 4x in different solvents .....</b>                                   | <b>S7</b>  |
| <b>4. References.....</b>                                                                                                           | <b>S10</b> |
| <b>5. NMR spectra of intermediate 5a and all products .....</b>                                                                     | <b>S11</b> |
| <b>6. X-ray data.....</b>                                                                                                           | <b>S42</b> |

## 1. General information

All reactions were performed using quartz tube. Solvents were dried by standard methods before they were used. Aryl alkynoates were synthesized according to the literature.<sup>1</sup> Commercial grade reagents were used without further purification. Silica gel was purchased from Qing Dao Hai Yang Chemical Industry Co. All reactions were carried out with photoreactor (Serial No: PEA12) which was purchased from LUOYANG JINFENG ELECTROMECHANICAL EQUIPMENT CO., LTD. The LCD Digital Hotplate Magnetic Stirrer MS-H-Pro+ and Digital Single Channel Adjustable Automatic Electronic Pipette Micropipette dPetee+ were purchased from Dragon Laboratory Instruments Limited. <sup>1</sup>H NMR and <sup>13</sup>C NMR spectra were recorded on 400 and 100 MHz NMR instruments using CDCl<sub>3</sub> as the solvent and TMS as the internal standard. <sup>19</sup>F NMR spectra was recorded at 376.5 MHz on Bruker DPX-400, the chemical shifts  $\delta$  are reported relative to CFC<sub>3</sub> ( $\delta = 0$  ppm) as internal standard. The multiplicity of signals is designated by the following abbreviations: s (singlet), d (doublet), t (triplet), q (quartet), m (multiplet), dd = doublet of doublet. High resolution mass spectra (HRMS) was obtained on an Agilent LC-MSD-Trap-XCT spectrometer with micromass MS software using electrospray ionisation (ESI). The UV/Vis absorption spectra was recorded on a Perkin Elmer Lambda 35 Spectrometer, and the fluorescence emission was recorded using a F-4500 FL spectrophotometer, the solid fluorescence quantum yield spectra was recorded on a C13534 UV-NIR absolute PL Quantum Yield Spectrometer.

## 2. UV/Vis absorption spectra, fluorescence emission spectra, measurement and calculation of fluorescence quantum yield

### 1) UV/Vis absorption spectra

The UV/Vis absorption spectra was recorded in MeCN of a 0.05 mM solution in 10 mm path length quartz cuvette on a Perkin Elmer Lambda 35 Spectrometer.

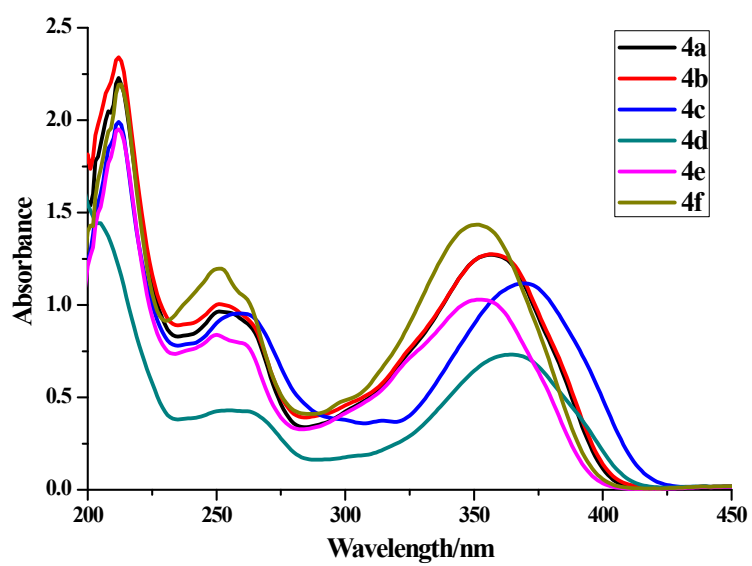

Figure S1. Absorption spectra of 4a-f in MeCN

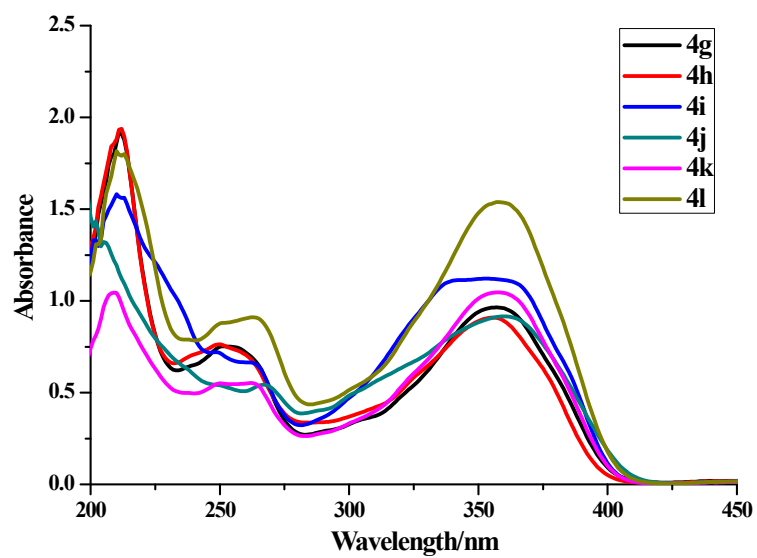

Figure S2. Absorption spectra of 4g-l in MeCN

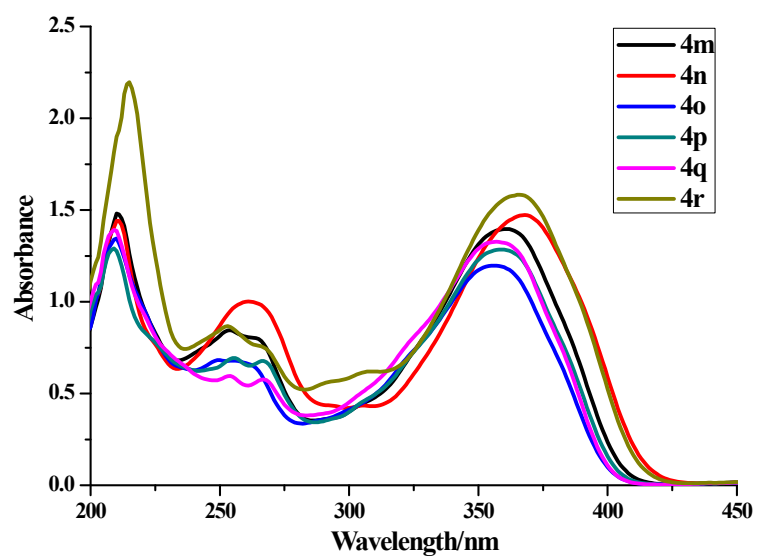

**Figure S3.** Absorption spectra of **4m-r** in MeCN

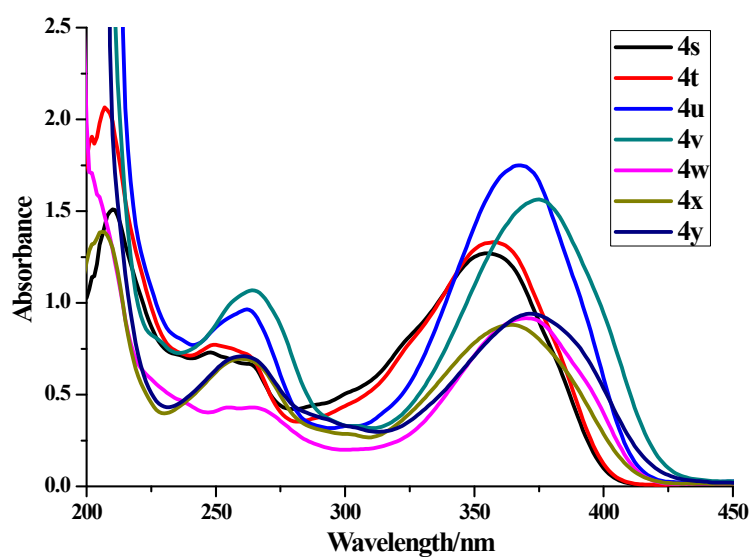

**Figure S4.** Absorption spectra of **4s-y** in MeCN

2) Fluorescence emission spectra were recorded using a F-4500 FL spectrophotometer in MeCN.

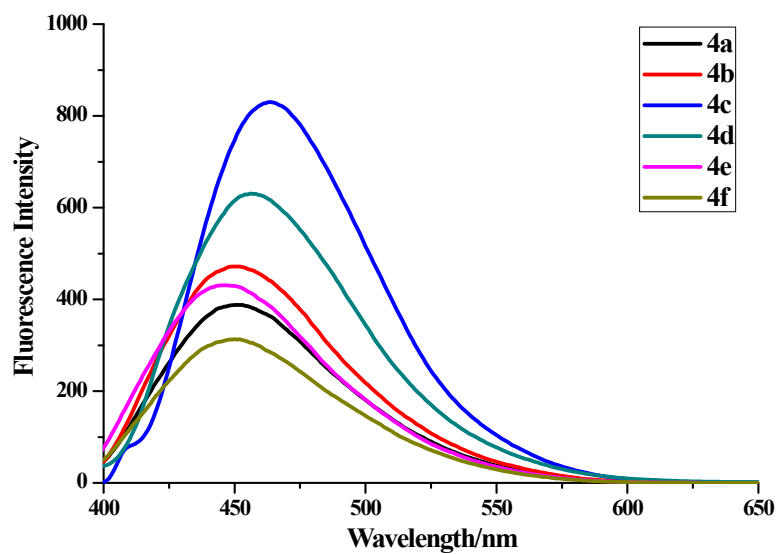

Figure S5. Fluorescence emission spectra of 4a-f in MeCN

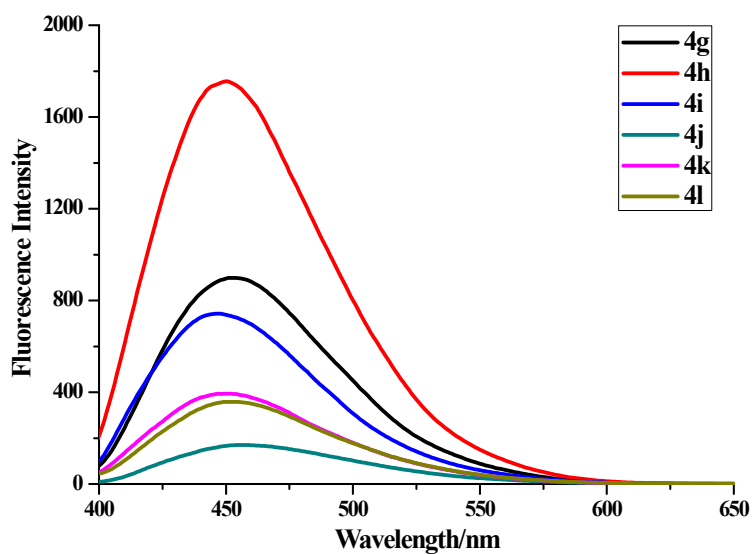

Figure S6. Fluorescence emission spectra of 4g-l in MeCN

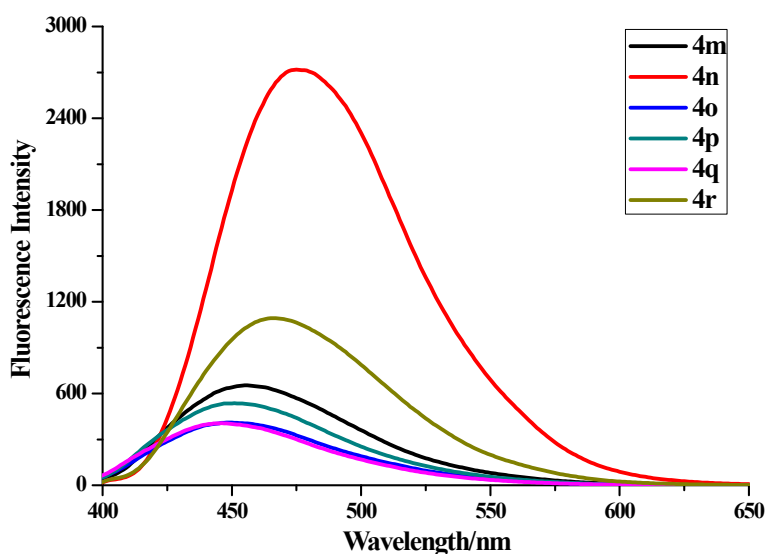

**Figure S7.** Fluorescence emission spectra of **4m-r** in MeCN

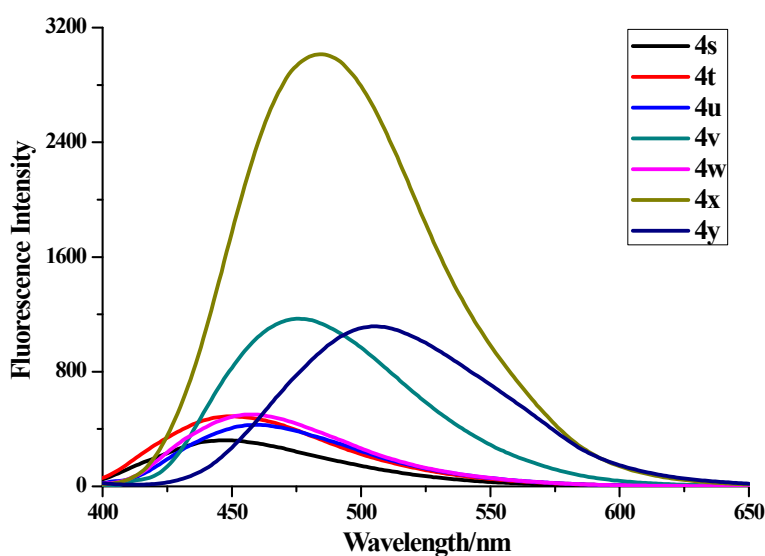

**Figure S8.** Fluorescence emission spectra of **4s-y** in MeCN

### 3) Measurement and calculation of fluorescence quantum yield

The quantum yields of the different samples were calculated using quinine sulfate (QY = 0.55) as the standard (in 0.1 M H<sub>2</sub>SO<sub>4</sub>).<sup>2</sup> Emission spectra of solutions were recorded from 300 to 650 nm, and 360 nm as the excitation wavelength as reference for calculation of quantum yield. Absorption and emission data of each samples were measured in 1 μM at 360 nm. And absorbance (optical density, OD) of all the samples was recorded at 360 nm. Fluorescence quantum yields were calculated according to equation (1),<sup>3</sup> in which

$\Phi_{\text{std}}$  is the quantum yield of the standard,  $F_x$  and  $F_{\text{std}}$  are the areas under the emission spectra of the sample and the reference, respectively,  $A_{\text{std}}$  and  $A_x$  are the absorbance of the standard and the sample;  $\eta_x^2$  and  $\eta_{\text{std}}^2$  are the refractive indices of the standard and the sample in solution.

$$\Phi_x = \Phi_{\text{std}} \times \frac{F_x}{F_{\text{std}}} \times \frac{A_{\text{std}}}{A_x} \times \frac{\eta_x^2}{\eta_{\text{std}}^2} \quad (1)$$

**Table S1.** Absorption, emission maxima and fluorescence quantum yield in acetonitrile solutions.

| coumarins | $\lambda_{\text{abs}}$ (nm) | $\lambda_{\text{em}}$ (nm) | $\Phi_F$ |
|-----------|-----------------------------|----------------------------|----------|
| <b>4a</b> | 356                         | 451                        | 0.014    |
| <b>4b</b> | 361                         | 450                        | 0.017    |
| <b>4c</b> | 371                         | 464                        | 0.014    |
| <b>4d</b> | 365                         | 456                        | 0.014    |
| <b>4e</b> | 352                         | 445                        | 0.011    |
| <b>4f</b> | 352                         | 450                        | 0.009    |
| <b>4g</b> | 357                         | 452                        | 0.031    |
| <b>4h</b> | 356                         | 450                        | 0.066    |
| <b>4i</b> | 354                         | 446                        | 0.026    |
| <b>4j</b> | 360                         | 455                        | 0.010    |
| <b>4k</b> | 358                         | 450                        | 0.015    |
| <b>4l</b> | 358                         | 454                        | 0.012    |
| <b>4m</b> | 361                         | 456                        | 0.021    |
| <b>4n</b> | 368                         | 475                        | 0.080    |
| <b>4o</b> | 356                         | 449                        | 0.017    |
| <b>4p</b> | 358                         | 451                        | 0.020    |
| <b>4q</b> | 357                         | 446                        | 0.012    |
| <b>4r</b> | 366                         | 467                        | 0.035    |
| <b>4s</b> | 354                         | 449                        | 0.008    |
| <b>4t</b> | 358                         | 450                        | 0.019    |
| <b>4u</b> | 375                         | 476                        | 0.028    |
| <b>4v</b> | 369                         | 460                        | 0.012    |

|           |     |     |       |
|-----------|-----|-----|-------|
| <b>4w</b> | 370 | 458 | 0.013 |
| <b>4x</b> | 365 | 484 | 0.115 |
| <b>4y</b> | 371 | 506 | 0.047 |

### 3. Photophysical properties of compounds **4a**, **4e**, **4h**, **4n** and **4x** in different solvents

#### 1) Normalized UV and FL spectra of compounds **4a**, **4e**, **4h**, **4n** and **4x** in different solvents

All luminescence spectra data were measured at 0.05 mM solution in different solvents, UV is ultraviolet absorption, FL is fluorescence intensity. The UV absorption spectra was measured in quartz cuvette on a Perkin Elmer Lambda 35 Spectrometer, and fluorescence emission spectra were measured by a F-4500 FL spectrophotometer.

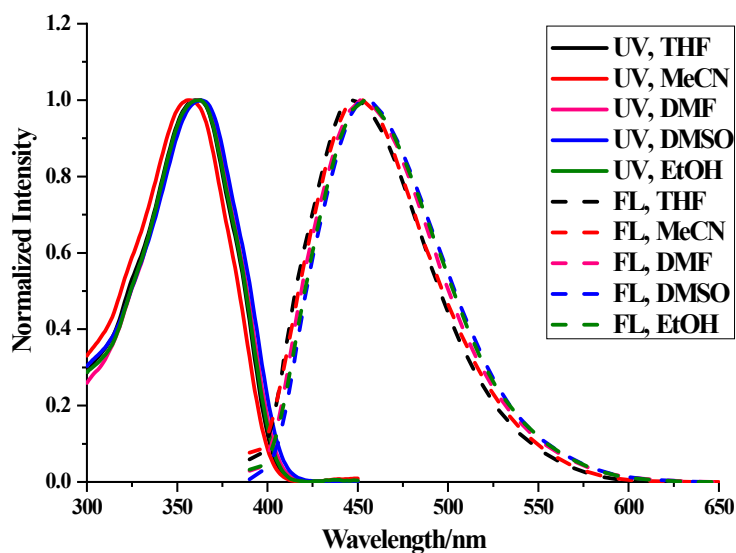

**Figure S9.** Normalized UV and FL spectra of compound **4a** in different solvents



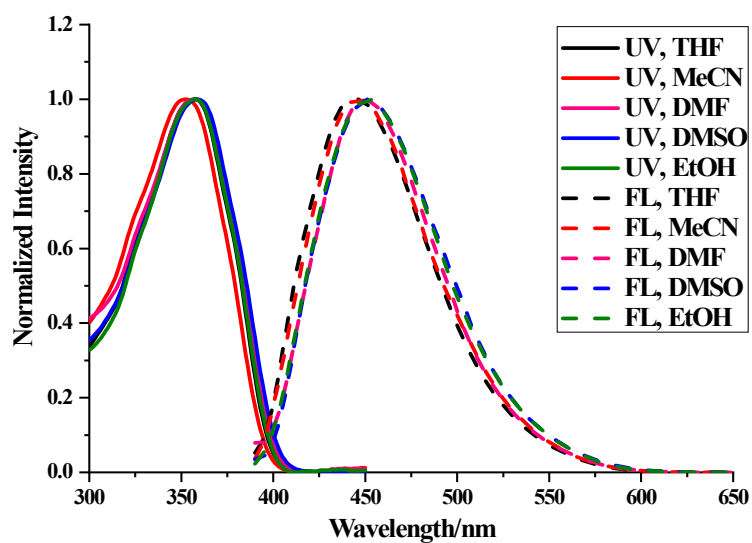

Figure S10. Normalized UV and FL spectra of compound **4e** in different solvents

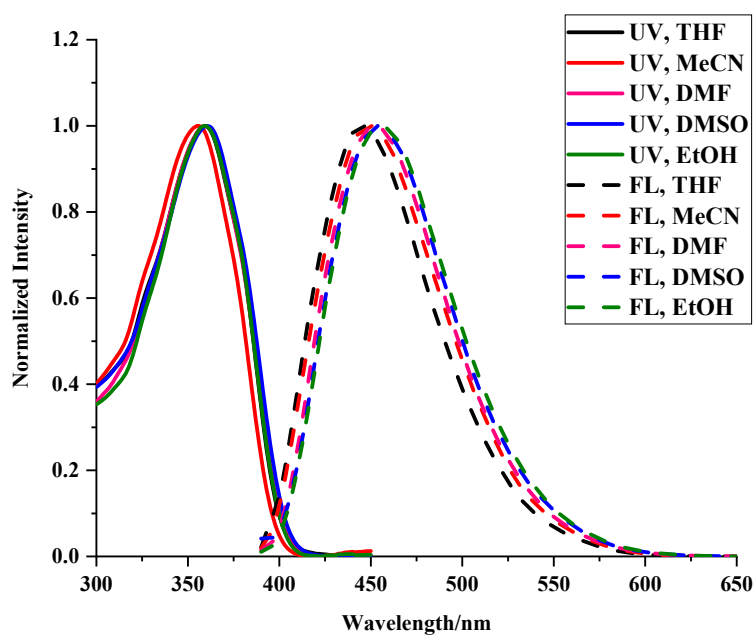

Figure S11. Normalized UV and FL spectra of compound **4h** in different solvents

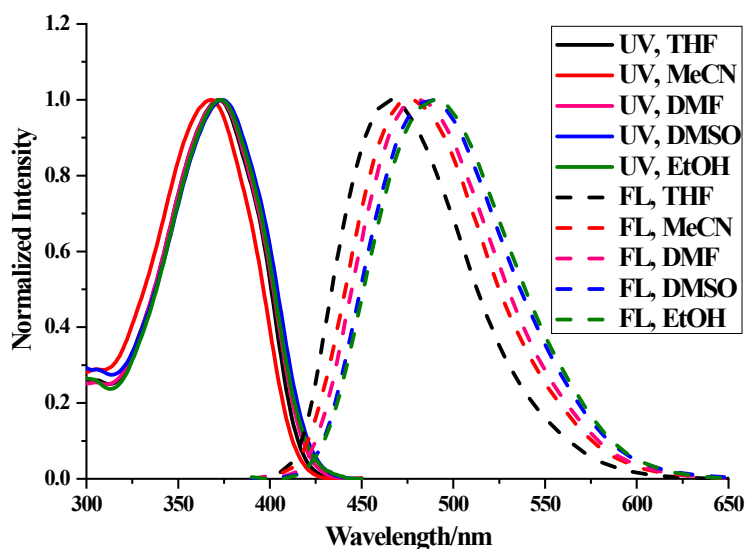

**Figure S12.** Normalized UV and FL spectra of compound **4n** in different solvents

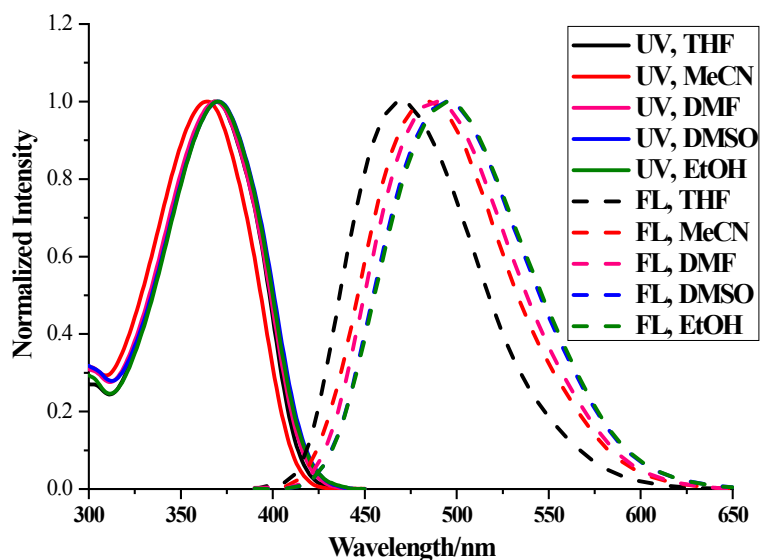

**Figure S13.** Normalized UV and FL spectra of compound **4x** in different solvents

2) UV spectra data, FL spectra data and calculation of fluorescence quantum yield of compounds **4a**, **4e**, **4h**, **4n** and **4x** in different solvents

UV and FL spectra data were measured at 0.05 mM solution in different solvents, data of fluorescence quantum yield were measured at 1  $\mu$ M solution in different solvents. UV is ultraviolet absorption, FL is fluorescence emission intensity,  $\lambda_{St}$  is Stokes shift,  $\Phi_F$  is fluorescence quantum yield. The UV absorption spectra was measured in quartz cuvette on a Perkin Elmer Lambda 35 Spectrometer, and fluorescence

emission spectra were measured by a F-4500 FL spectrophotometer.

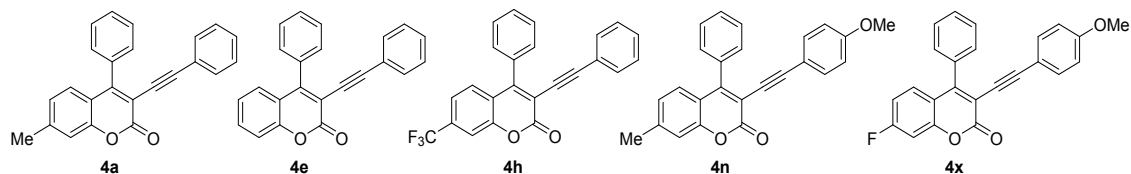

**Table S2.** UV, FL and fluorescence quantum yield in different solutions.<sup>a,b</sup>

| Solvent      | 4a                     |                       |                   | 4e                     |                       |                   | 4h                     |                       |                   | 4n                     |                       |                   | 4x                     |                       |                   |
|--------------|------------------------|-----------------------|-------------------|------------------------|-----------------------|-------------------|------------------------|-----------------------|-------------------|------------------------|-----------------------|-------------------|------------------------|-----------------------|-------------------|
|              | $\lambda_{\text{abs}}$ | $\lambda_{\text{em}}$ | $\Phi_{\text{F}}$ |
|              | (nm)                   | (nm)                  |                   | (nm)                   | (nm)                  |                   | (nm)                   | (nm)                  |                   | (nm)                   | (nm)                  |                   | (nm)                   | (nm)                  |                   |
| THF          | 361                    | 447                   | 0.047             | 357                    | 446                   | 0.061             | 359                    | 446                   | 0.136             | 372                    | 466                   | 0.143             | 370                    | 470                   | 0.209             |
| MeCN         | 357                    | 451                   | 0.014             | 352                    | 445                   | 0.011             | 356                    | 450                   | 0.066             | 368                    | 475                   | 0.080             | 365                    | 484                   | 0.115             |
| DMF          | 362                    | 452                   | 0.047             | 358                    | 450                   | 0.033             | 360                    | 453                   | 0.136             | 372                    | 479                   | 0.155             | 368                    | 489                   | 0.172             |
| DMSO         | 363                    | 454                   | 0.034             | 359                    | 451                   | 0.106             | 360                    | 454                   | 0.055             | 374                    | 488                   | 0.160             | 370                    | 494                   | 0.137             |
| EtOH         | 362                    | 454                   | 0.022             | 358                    | 451                   | 0.020             | 359                    | 455                   | 0.061             | 373                    | 489                   | 0.121             | 370                    | 495                   | 0.128             |
| <i>Solid</i> | 441                    | 490                   | 0.486             | 446                    | 476                   | 0.168             | 435                    | 486                   | -                 | 458                    | 514                   | -                 | 472                    | 512                   | 0.439             |

<sup>a</sup> UV and FL spectra data were measured at 0.05 mM solution in different solvents. <sup>b</sup> The quantum yield was calculated using quinine sulfspecate as the standard (in 0.1 M H<sub>2</sub>SO<sub>4</sub>) at 360 nm in different solvents.

## 4. References

- 1 C. E. Song, D. Jung, S. Y. Choung, E. J. Roh and S. Lee, *Angew. Chem. Int. Ed.*, 2004, **43**, 6183-6185.
- 2 W. H. Melhuish, *J. Phys. Chem.*, 1961, **65**, 229-235.

## 5. NMR spectra of intermediate 5a and all products

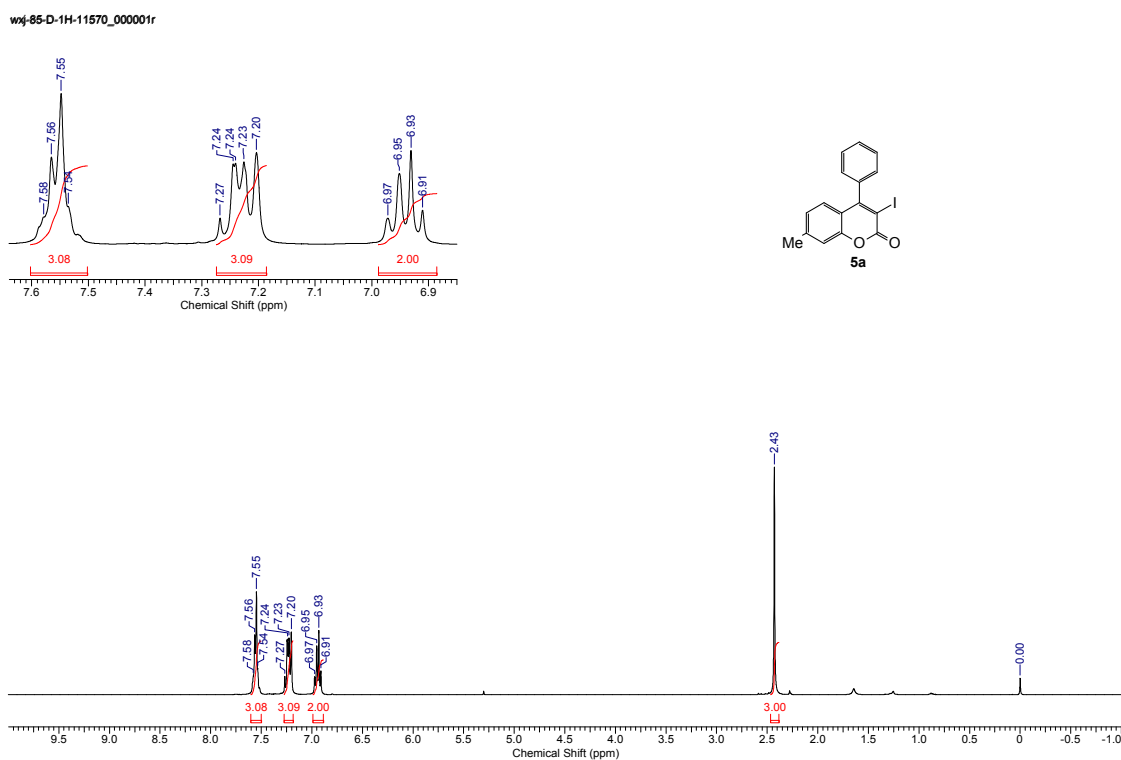

Figure S14. <sup>1</sup>H NMR spectrum of compound **5a**

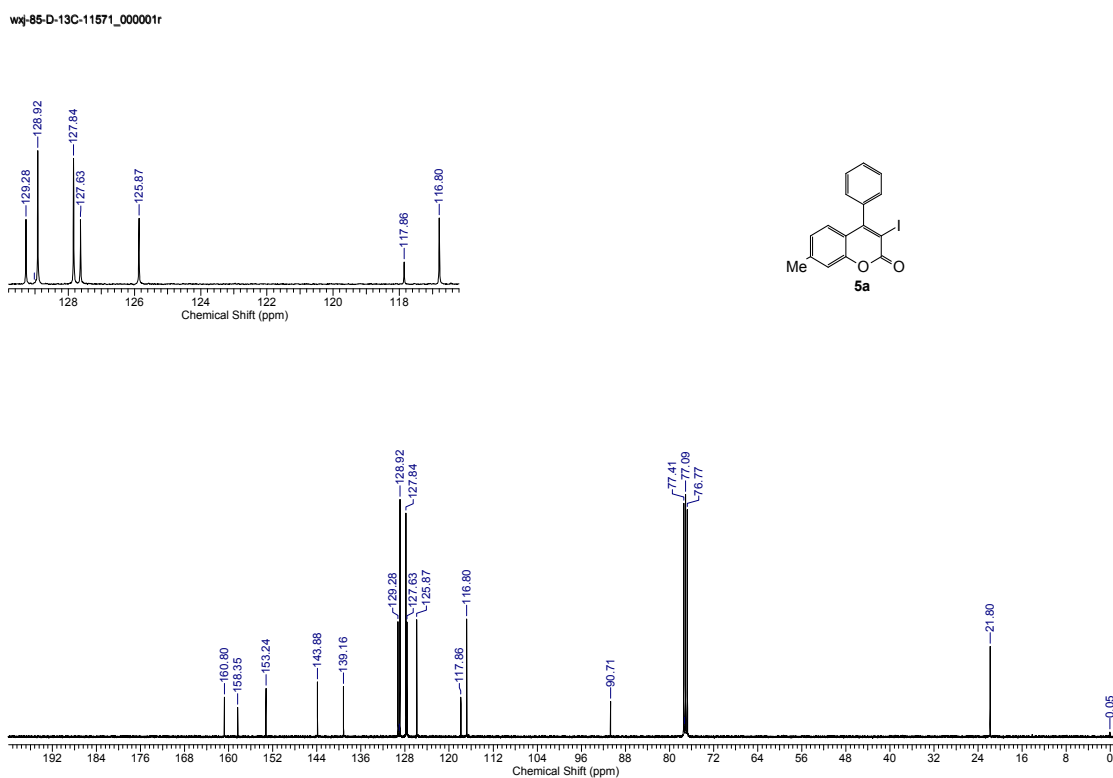

Figure S15. <sup>13</sup>C NMR spectrum of compound **5a**

WXJ-79-1H,11140\_000001r

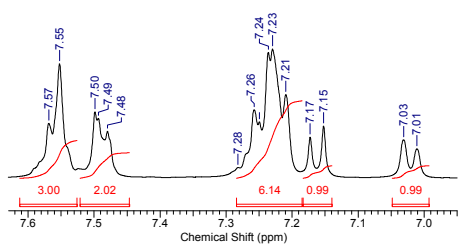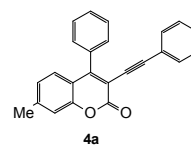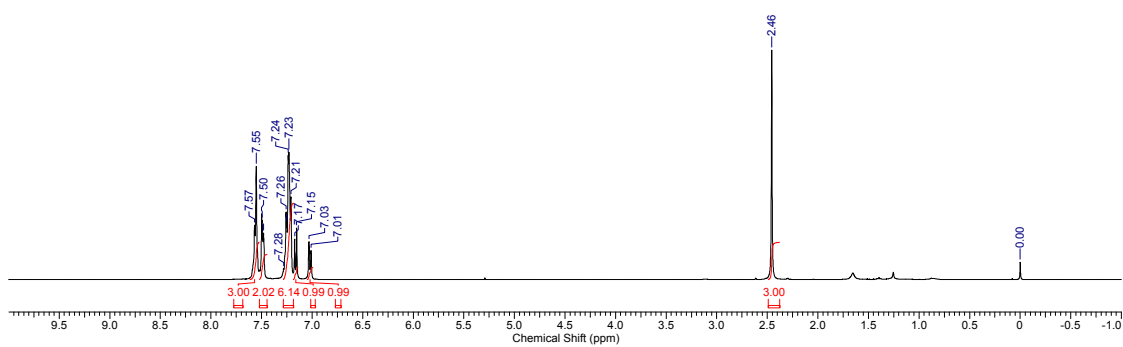

Figure S16. <sup>1</sup>H NMR spectrum of compound 4a

WXJ-80-13C,11451\_000001r

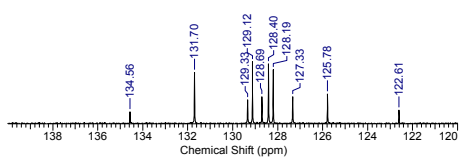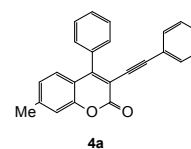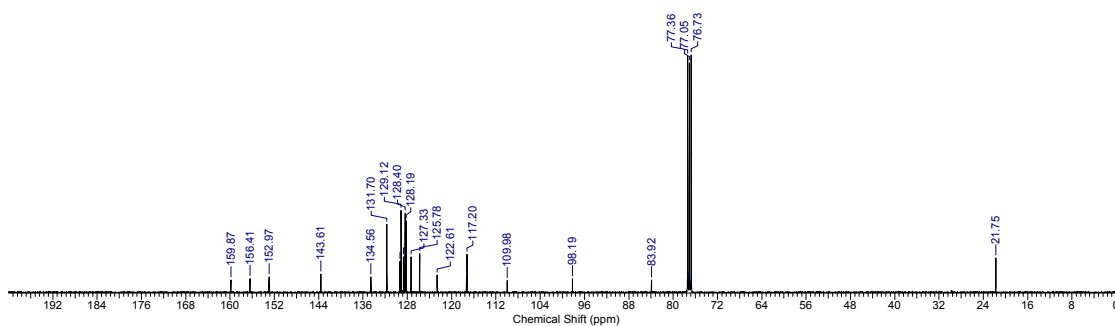

Figure S17. <sup>13</sup>C NMR spectrum of compound 4a

WXJ-139-1H,2160\_000001r

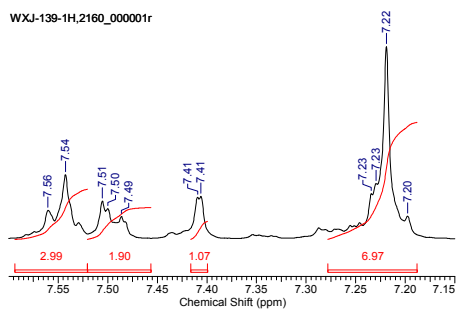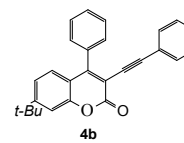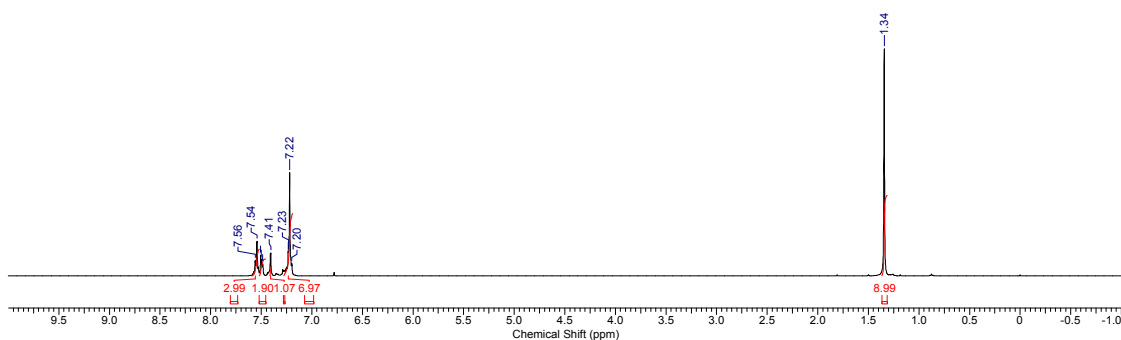

Figure S18. <sup>1</sup>H NMR spectrum of compound **4b**

WXJ-139-13C,1801\_000001r

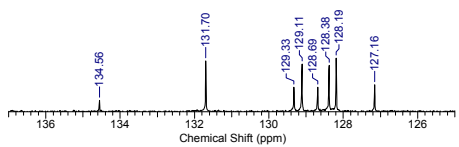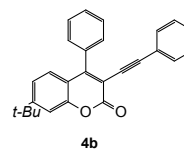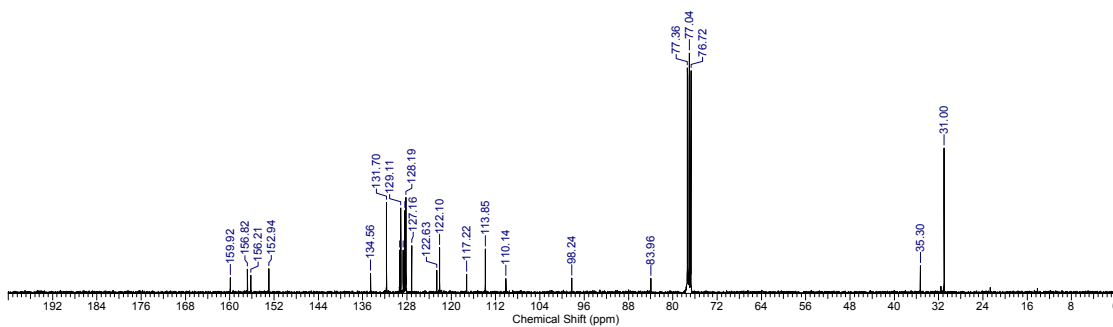

Figure S19. <sup>13</sup>C NMR spectrum of compound **4b**

WXJ-138-1H,1430\_000001r

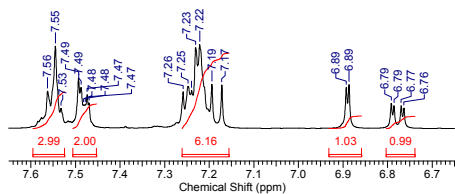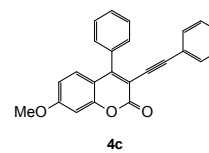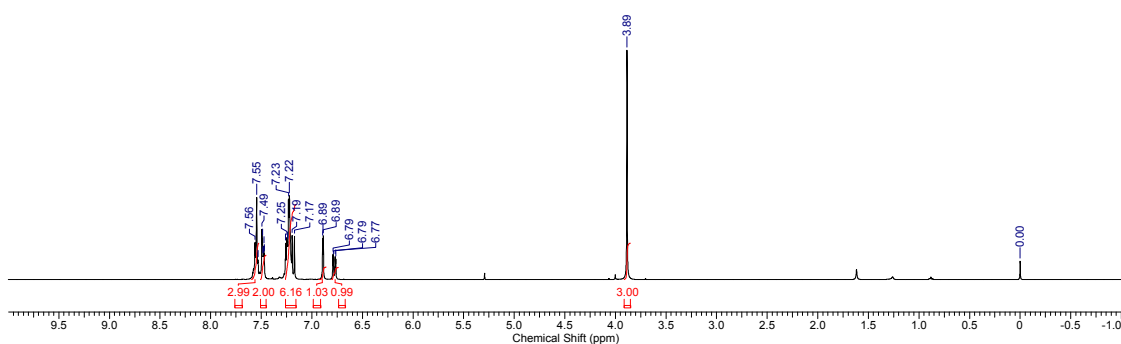

Figure S20. <sup>1</sup>H NMR spectrum of compound **4c**

WXJ-138-13C,1431\_000001r

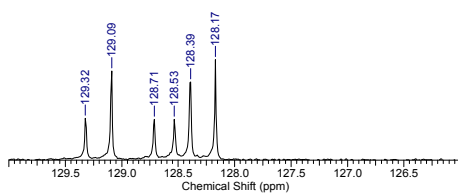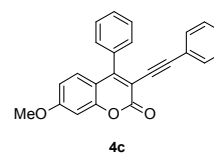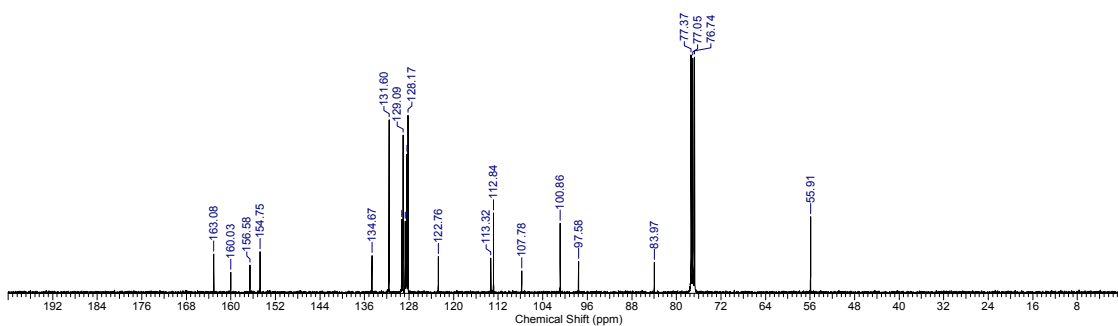

Figure S21. <sup>13</sup>C NMR spectrum of compound **4c**

WXJ-202-1H,770\_000001r

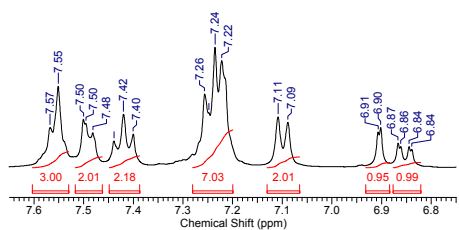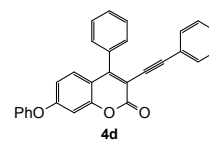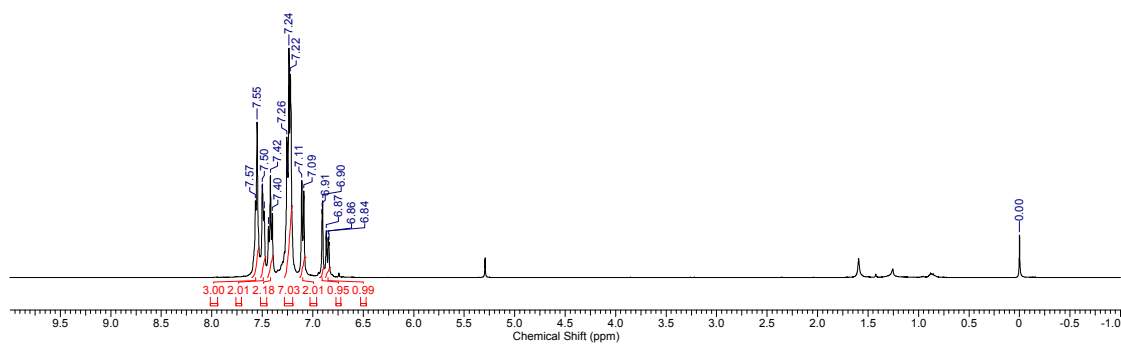

Figure S22.  $^1\text{H}$  NMR spectrum of compound **4d**

WXJ-202-13C,3051\_000001r

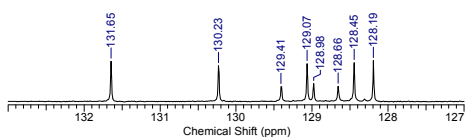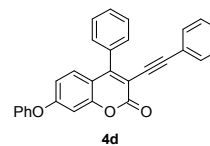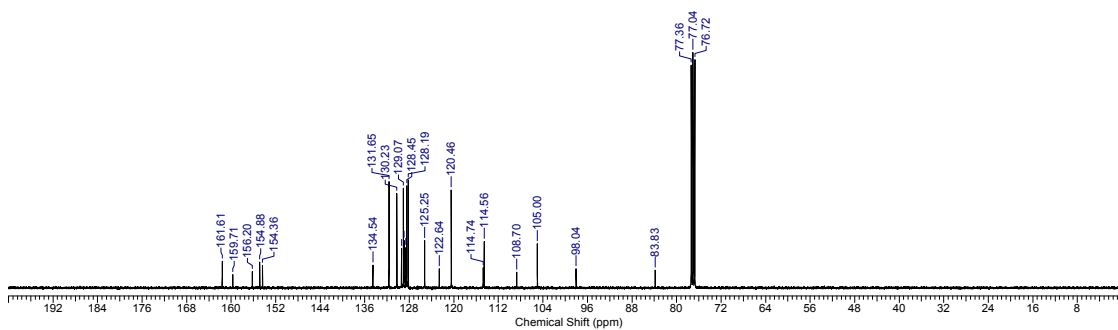

Figure S23.  $^{13}\text{C}$  NMR spectrum of compound **4d**



WXJ-203-1H,3060\_000001r

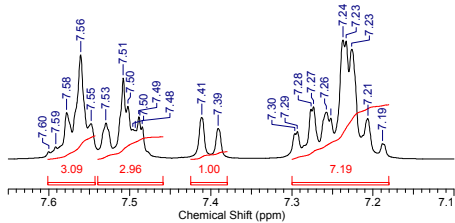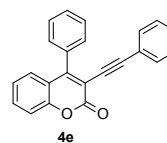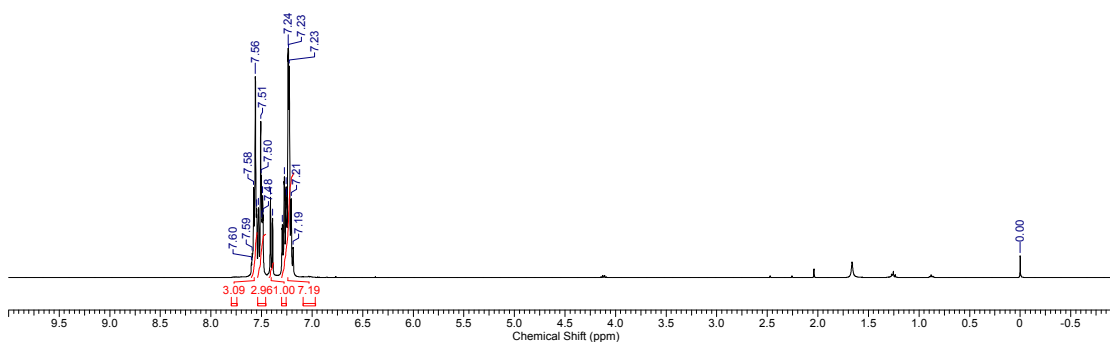

Figure S24. <sup>1</sup>H NMR spectrum of compound 4e

WXJ-203-13C,3061\_000001r

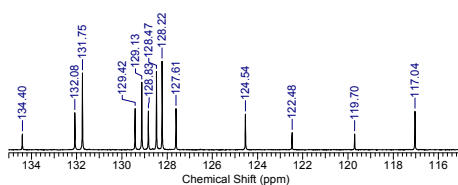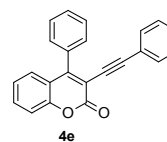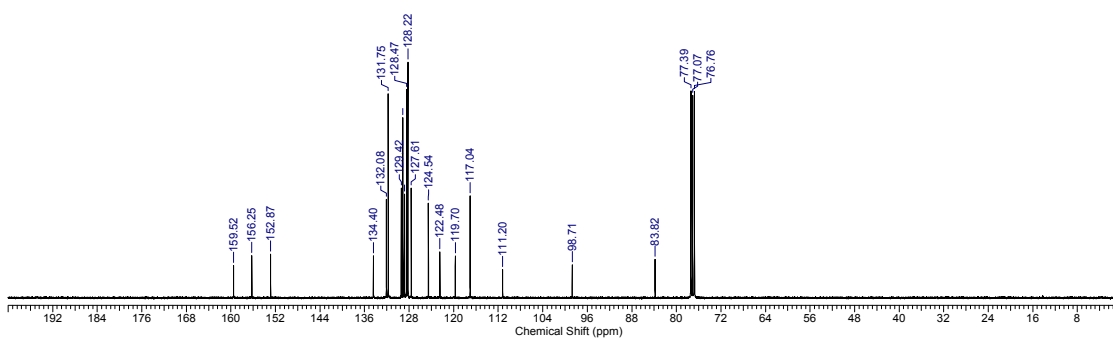

Figure S25. <sup>13</sup>C NMR spectrum of compound 4e

WXJ-200-1H,2830\_000001r

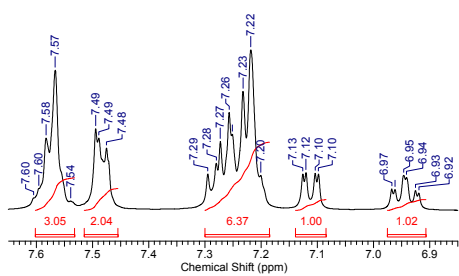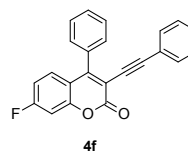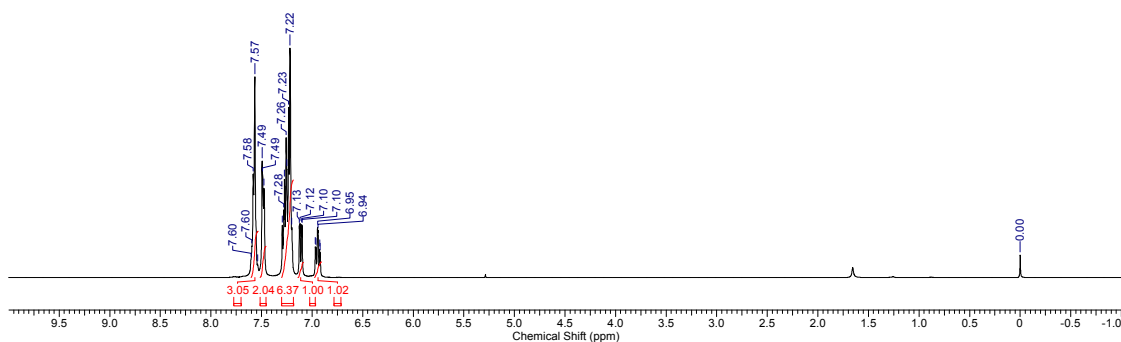

Figure S26. <sup>1</sup>H NMR spectrum of compound 4f

WXJ-200-13C,2931\_000001r

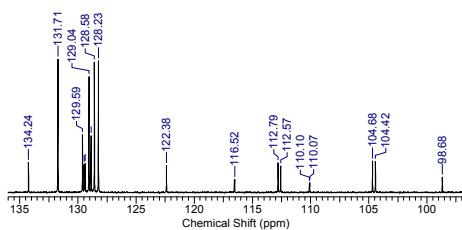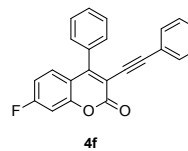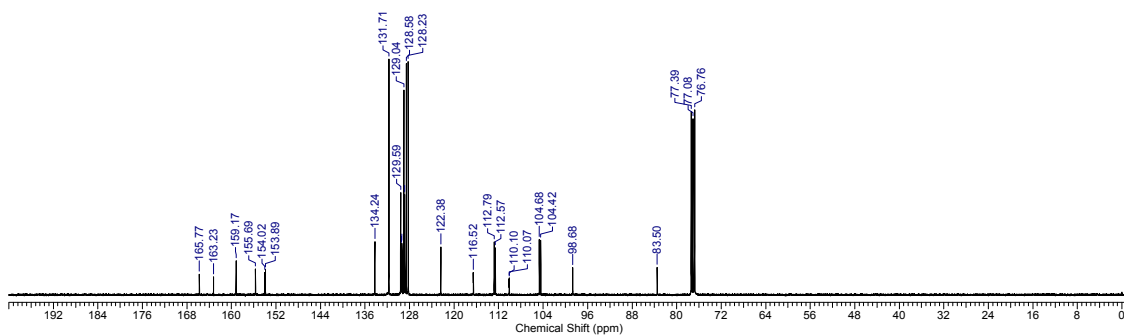

Figure S27. <sup>13</sup>C NMR spectrum of compound 4f

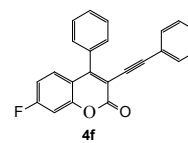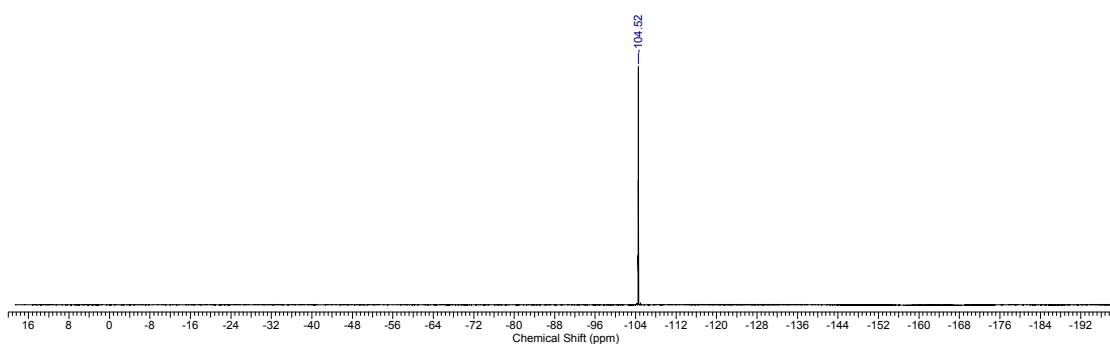Figure S28.  $^{19}\text{F}$  NMR spectrum of compound 4f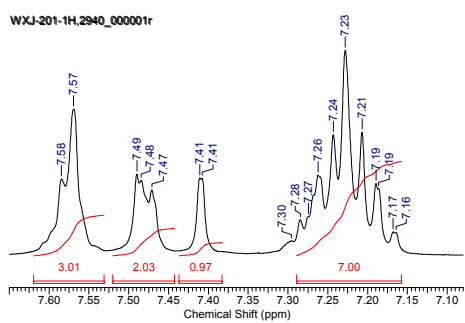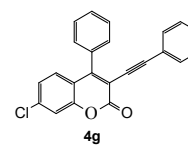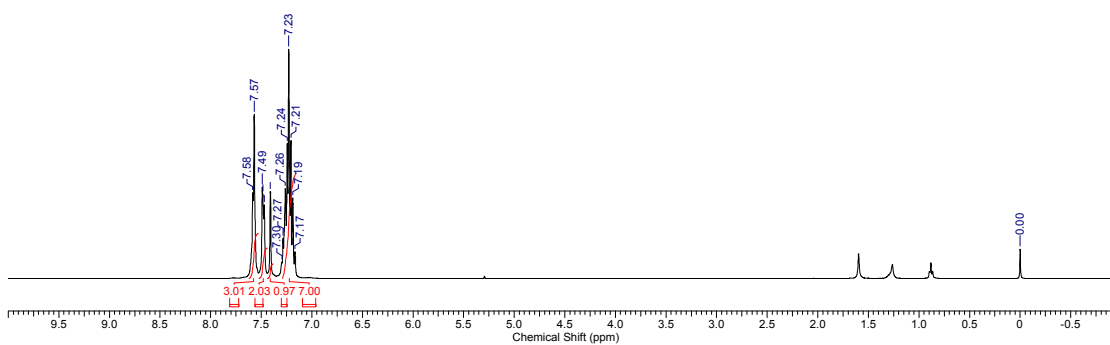Figure S29.  $^1\text{H}$  NMR spectrum of compound 4g

WXJ-201-13C.2941\_000001r

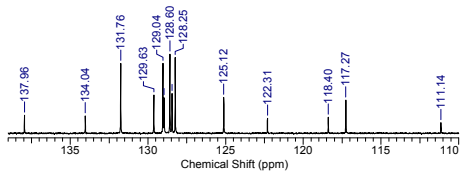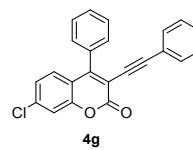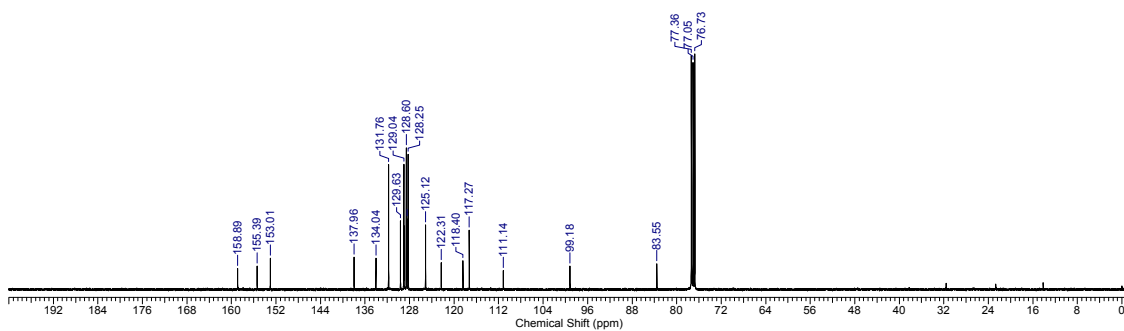

Figure S30. <sup>13</sup>C NMR spectrum of compound 4g

WXJ-237-1H.6160\_000001r

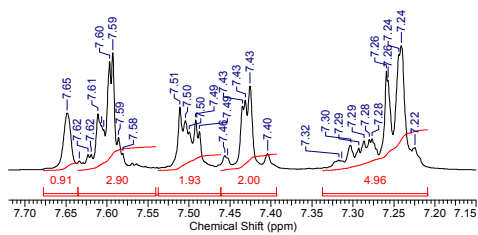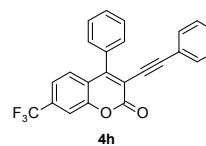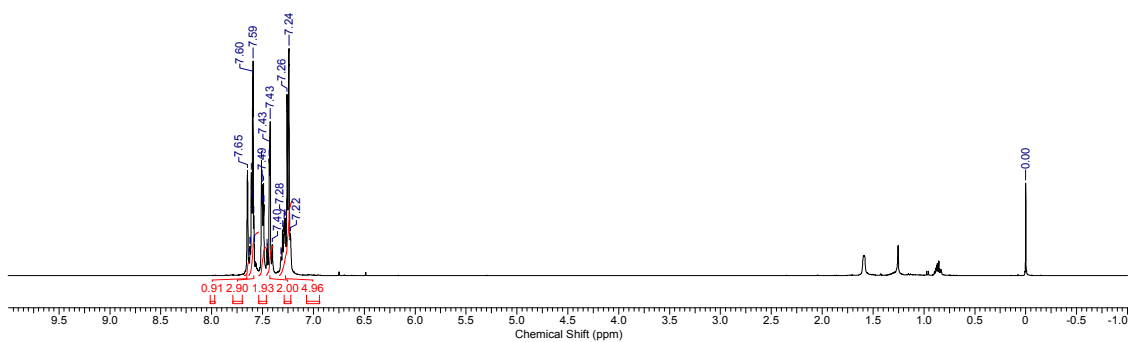

Figure S31. <sup>1</sup>H NMR spectrum of compound 4h

WXJ-237-13C\_4931\_000001r

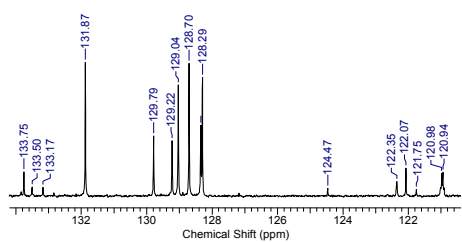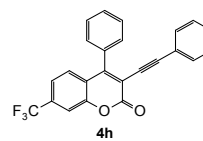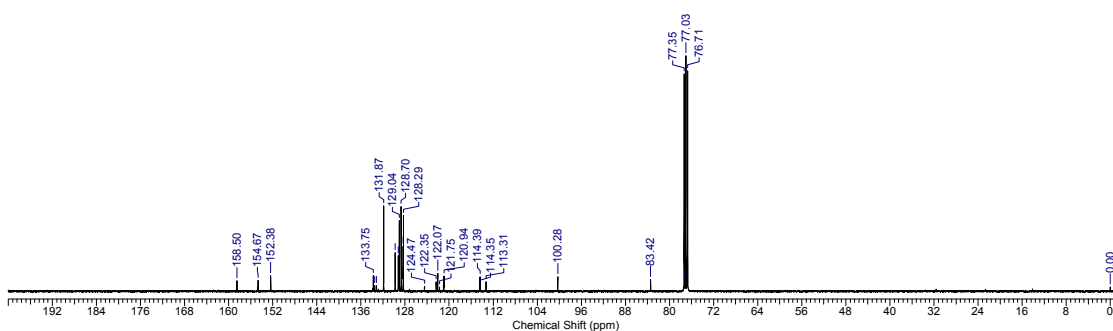

Figure S32. <sup>13</sup>C NMR spectrum of compound 4h

WXJ-237-19F\_4932\_000001r

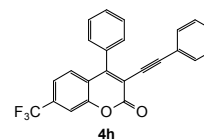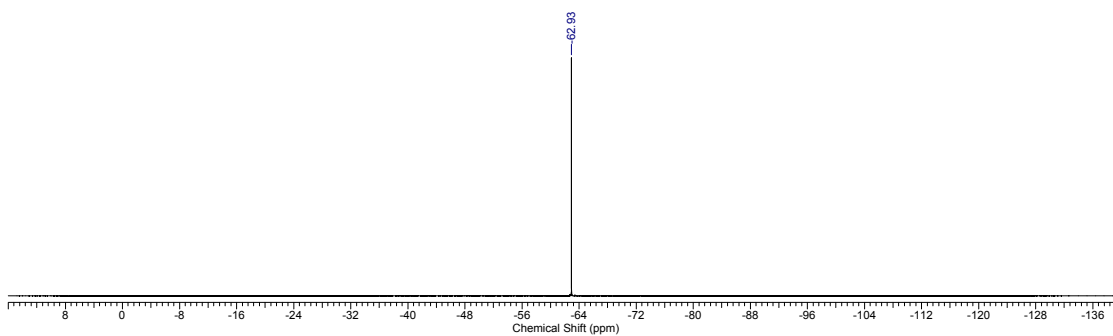

Figure S33. <sup>19</sup>F NMR spectrum of compound 4h

WXJ-146-1H\_520\_000001r

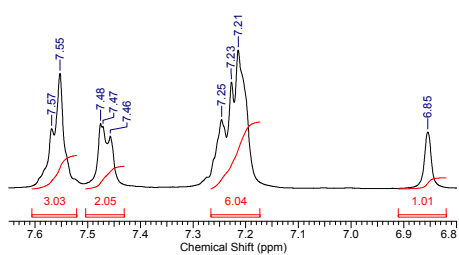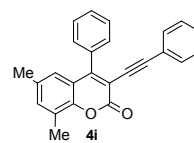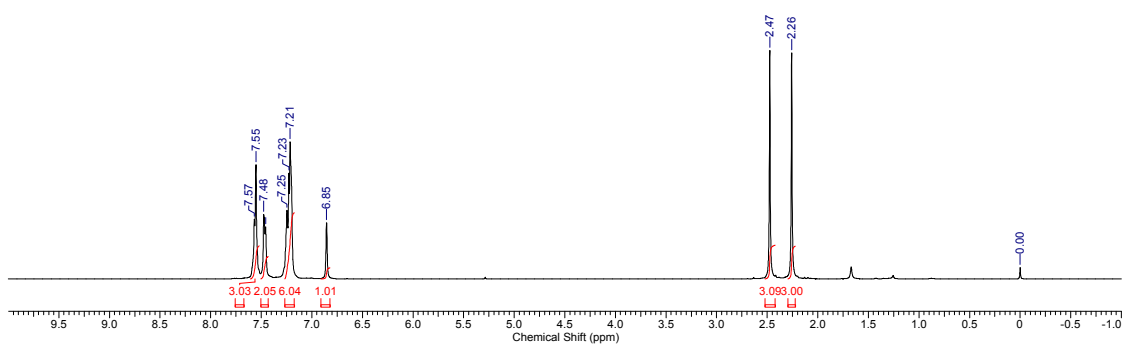

Figure S34. <sup>1</sup>H NMR spectrum of compound **4i**

WXJ-146-13C\_521\_000001r

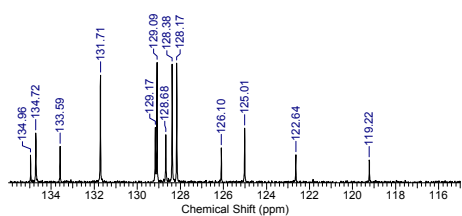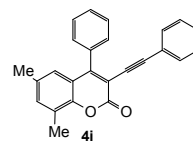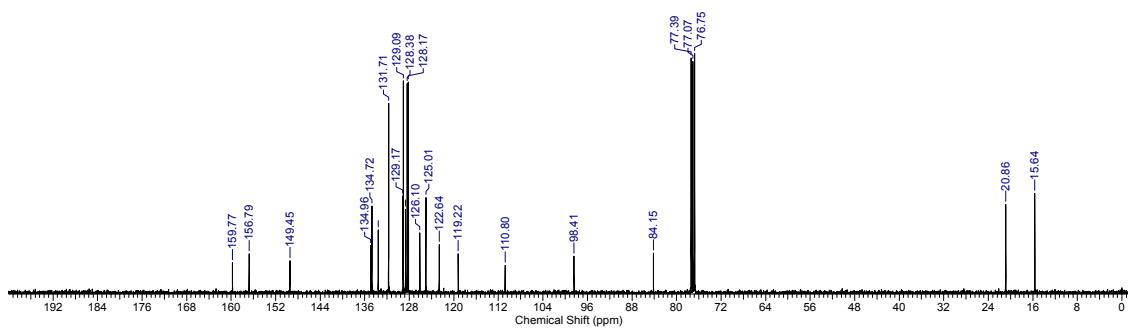

Figure S35. <sup>13</sup>C NMR spectrum of compound **4i**

WXJ-254-1H,14170\_000001r

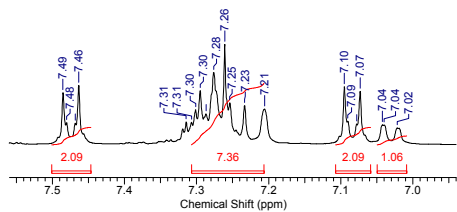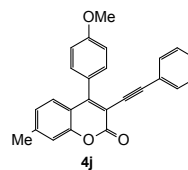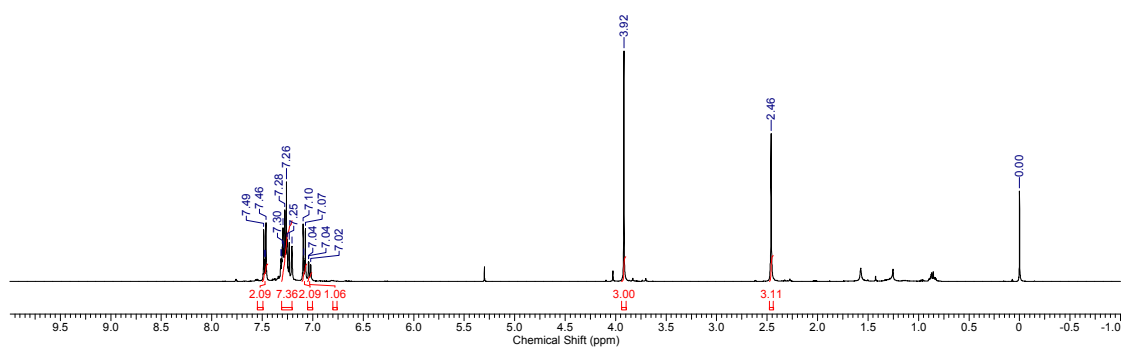

Figure S36. <sup>1</sup>H NMR spectrum of compound 4j

WXJ-254-13C,6331\_000001r

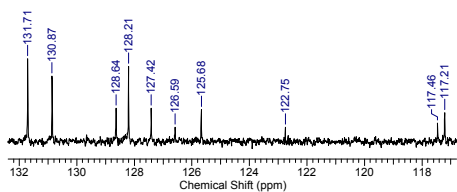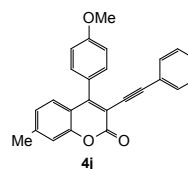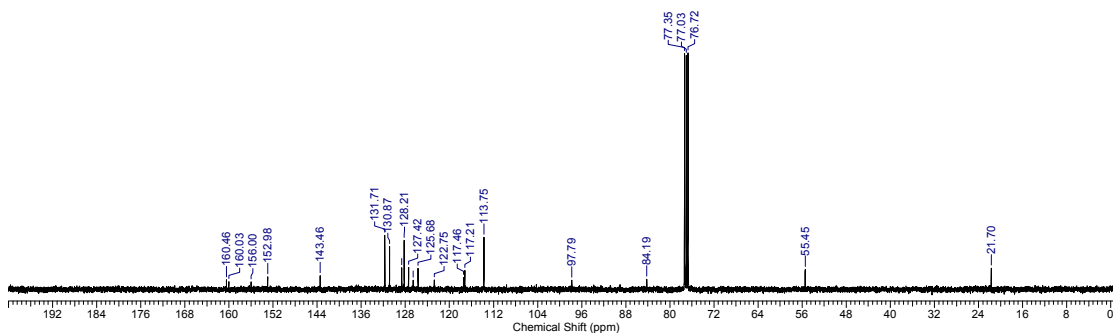

Figure S37. <sup>13</sup>C NMR spectrum of compound 4j

WXJ-246-1H,5700\_000001r

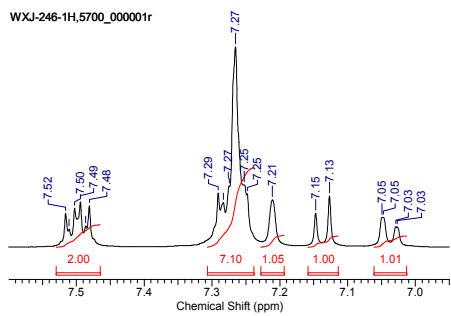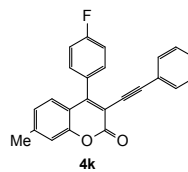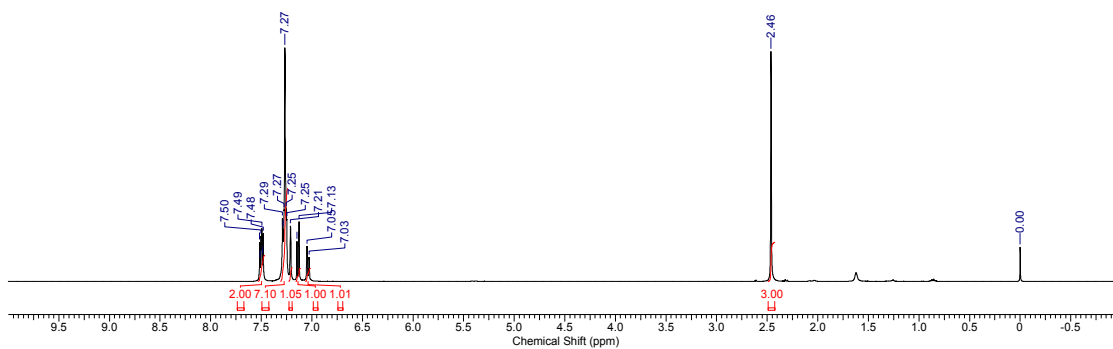

Figure S38.  $^1\text{H}$  NMR spectrum of compound **4k**

WXJ-246-13C,5701\_000001r

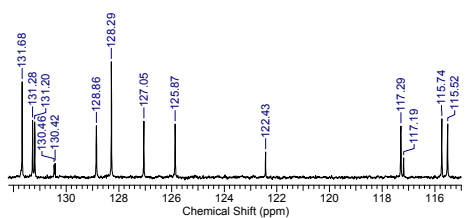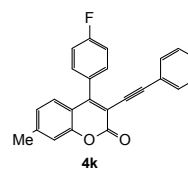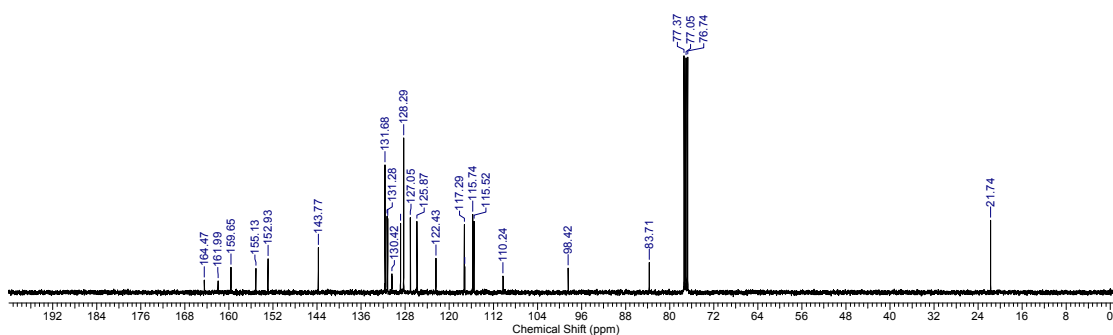

Figure S39.  $^{13}\text{C}$  NMR spectrum of compound **4k**



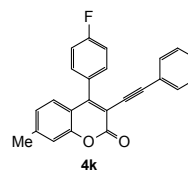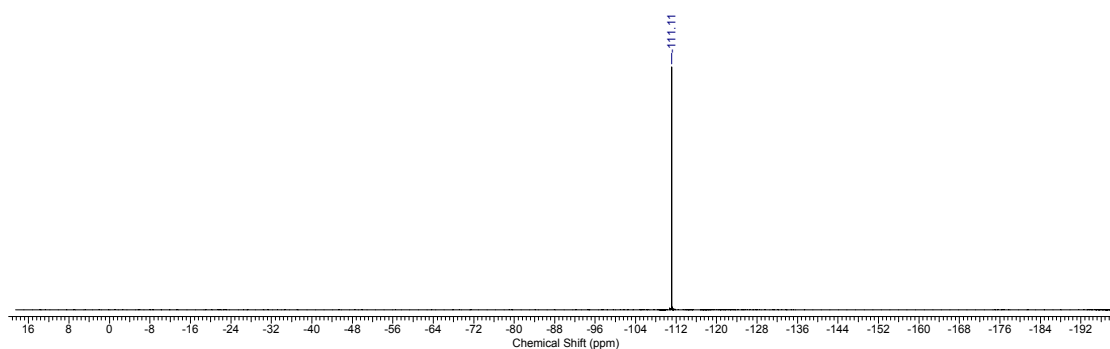Figure S40.  $^{19}\text{F}$  NMR spectrum of compound 4k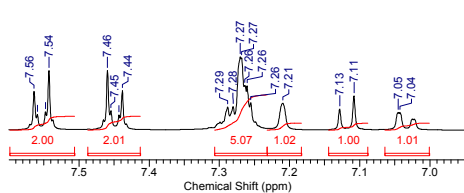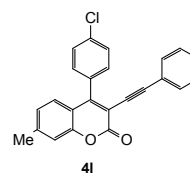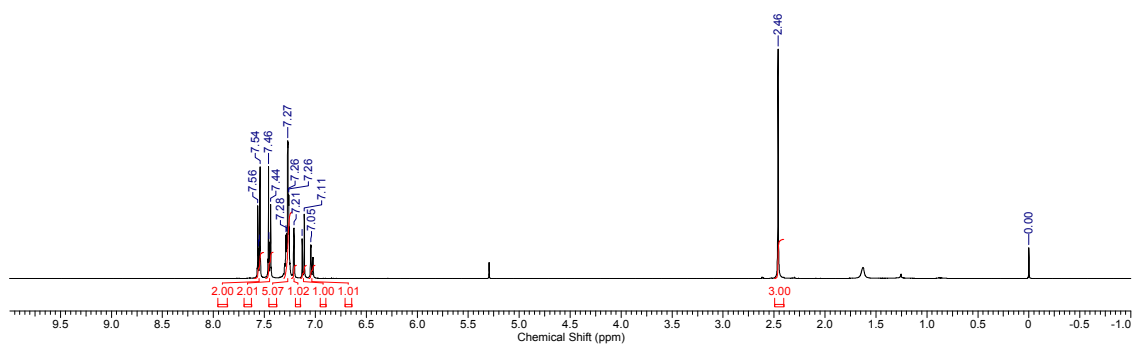Figure S41.  $^1\text{H}$  NMR spectrum of compound 4l

WXJ-245-13C,5691\_000001r

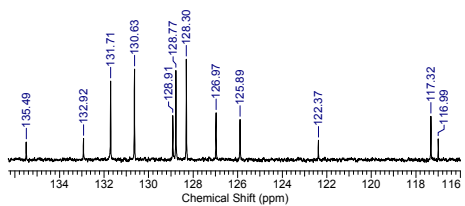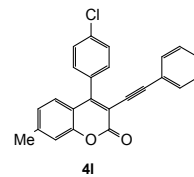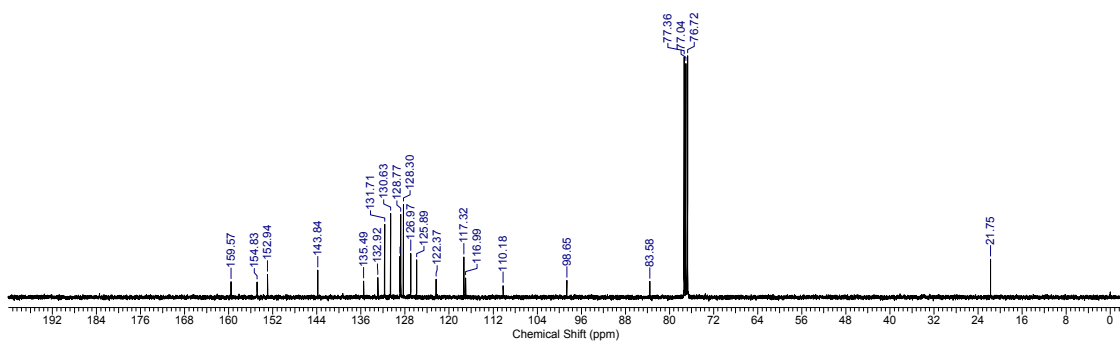

Figure S42. <sup>13</sup>C NMR spectrum of compound 41

WXJ-159-1H,1640\_000001r

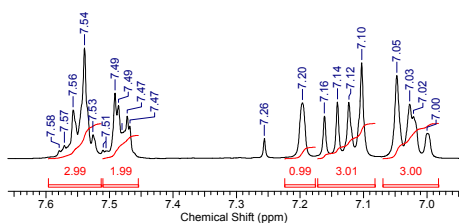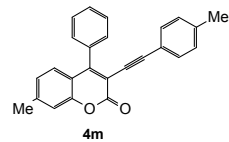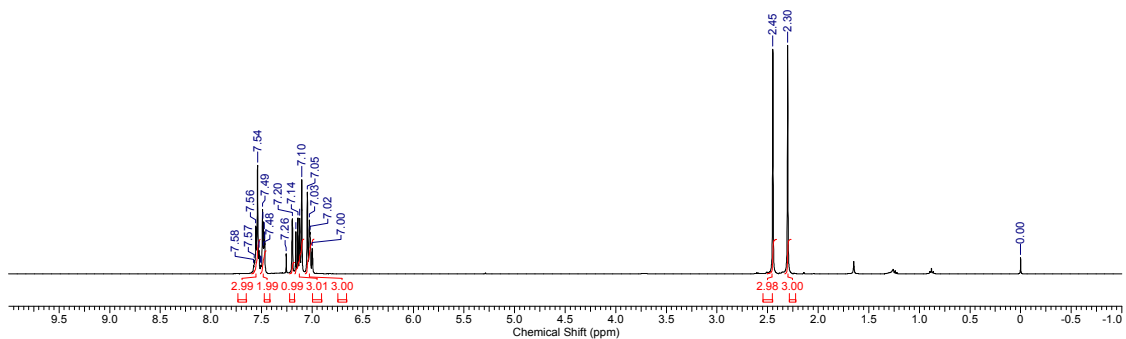

Figure S43. <sup>1</sup>H NMR spectrum of compound 4m

WXJ-159-13C,1641\_000001r

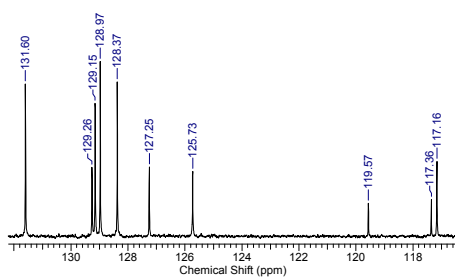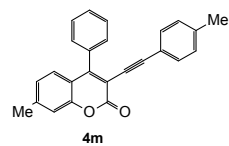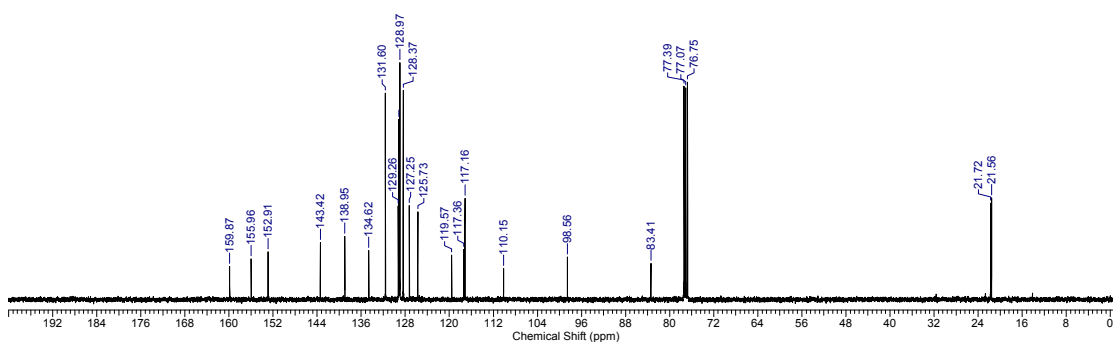

Figure S44. <sup>13</sup>C NMR spectrum of compound 4m

WXJ-232-1H,4910\_000001r

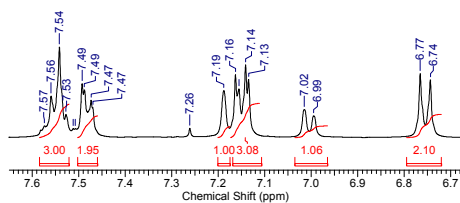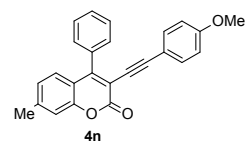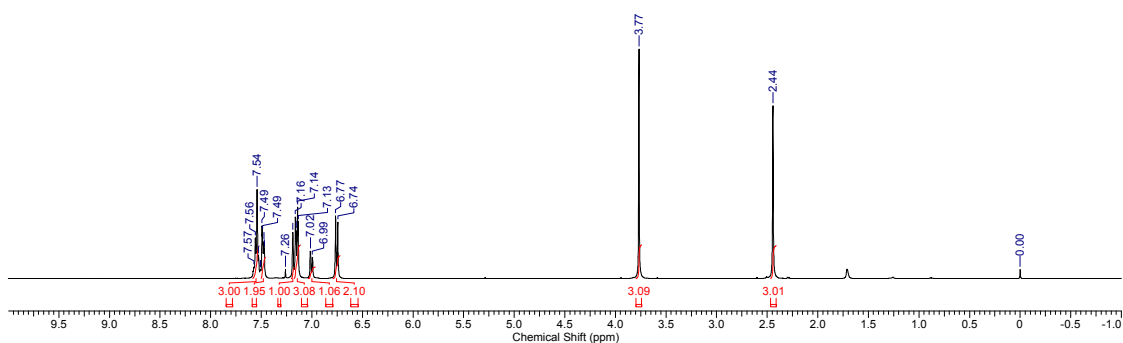

Figure S45. <sup>1</sup>H NMR spectrum of compound 4n

WXJ-232-13C\_4911\_000001r

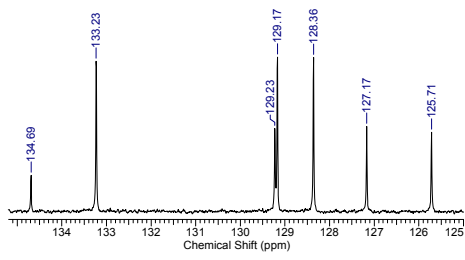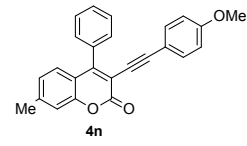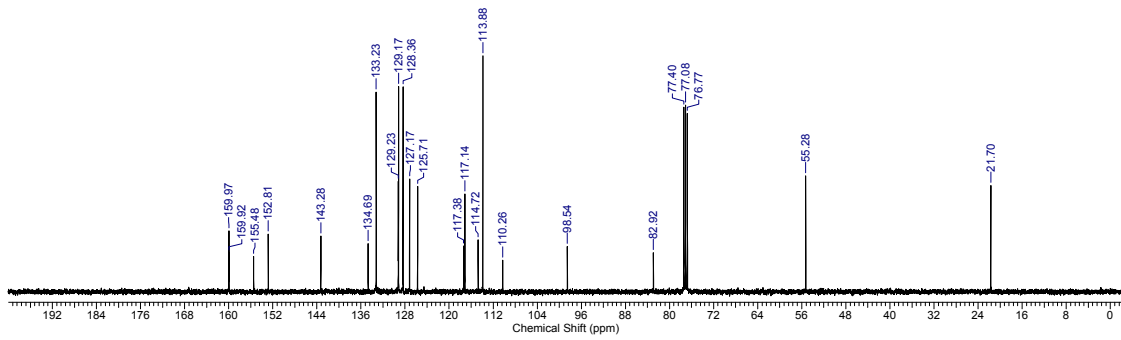

Figure S46. <sup>13</sup>C NMR spectrum of compound 4n

WXJ-154-1H\_510\_000001r

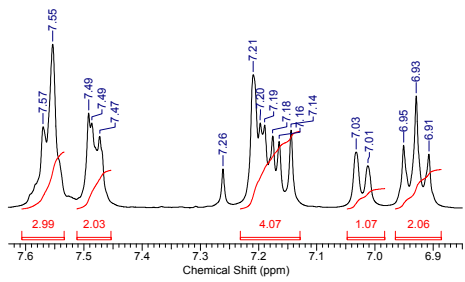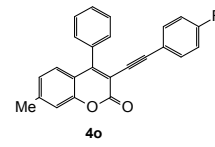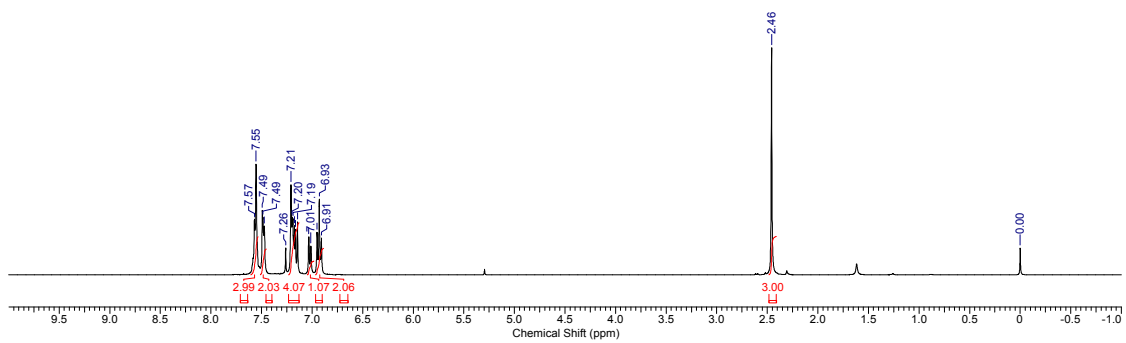

Figure S47. <sup>1</sup>H NMR spectrum of compound 4o

WXJ-154-13C,1221\_000001r

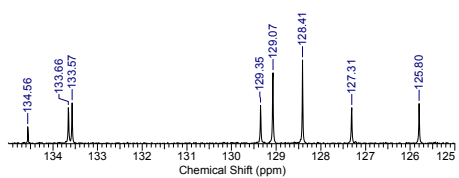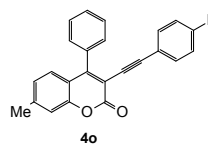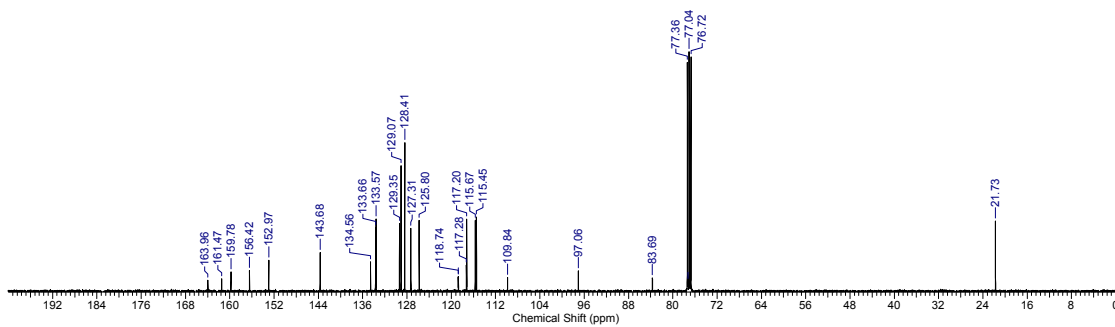

Figure S48. <sup>13</sup>C NMR spectrum of compound **4o**

WXJ-154-19F,1222\_000001r

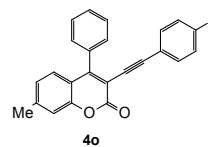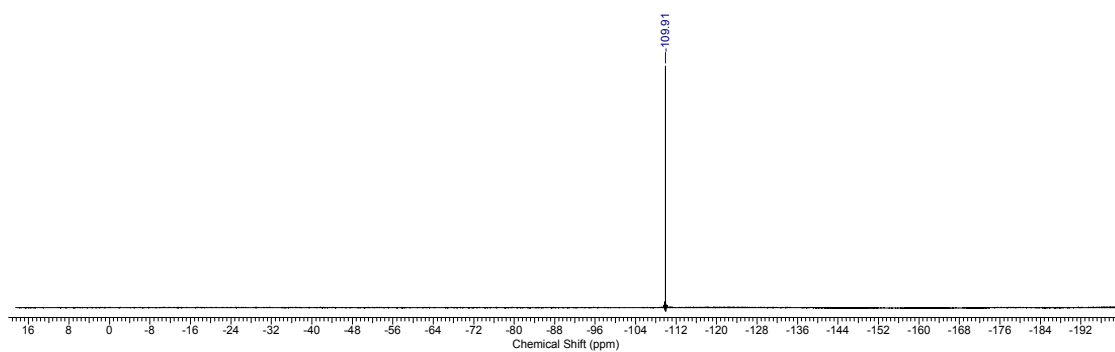

Figure S49. <sup>19</sup>F NMR spectrum of compound **4o**

WXJ-160-1H,1660\_000001r

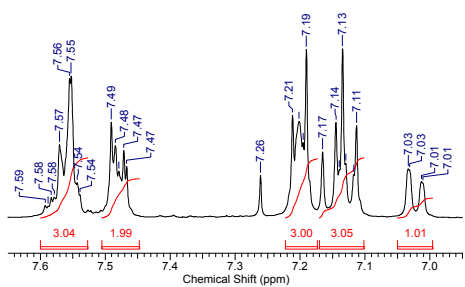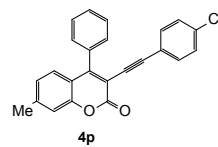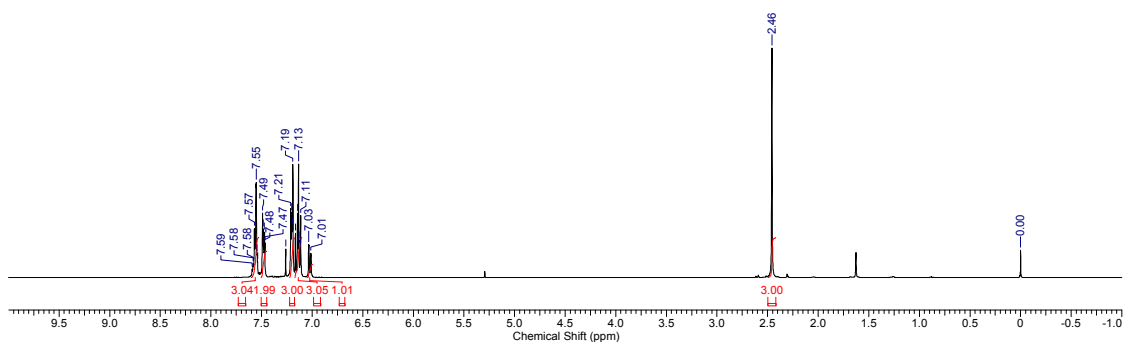

Figure S50. <sup>1</sup>H NMR spectrum of compound 4p

WXJ-160-13C,1661\_000001r

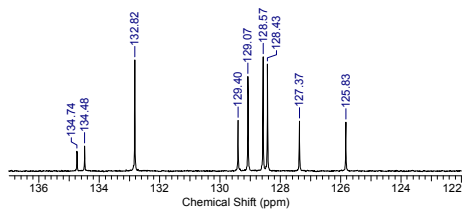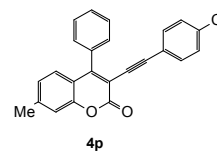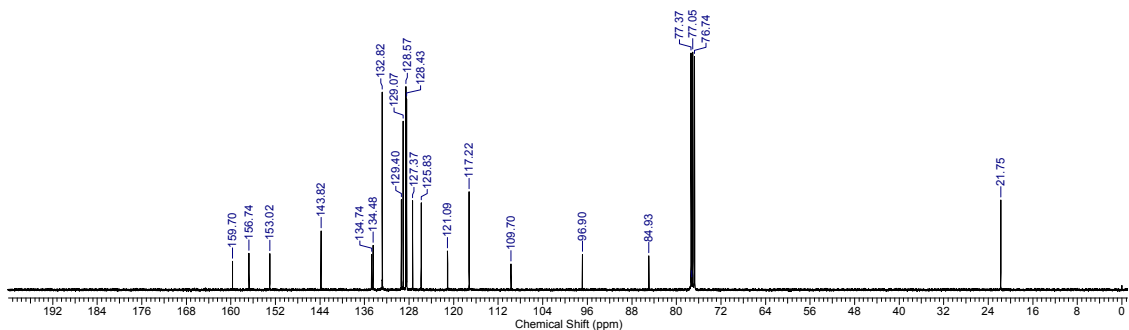

Figure S51. <sup>13</sup>C NMR spectrum of compound 4p

WXJ-255-1H,6300\_000001r

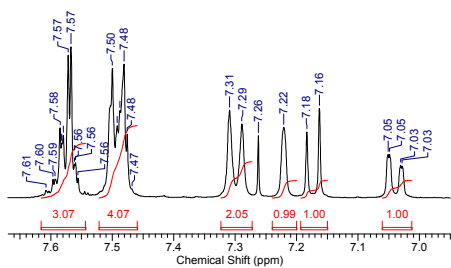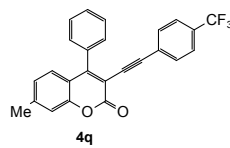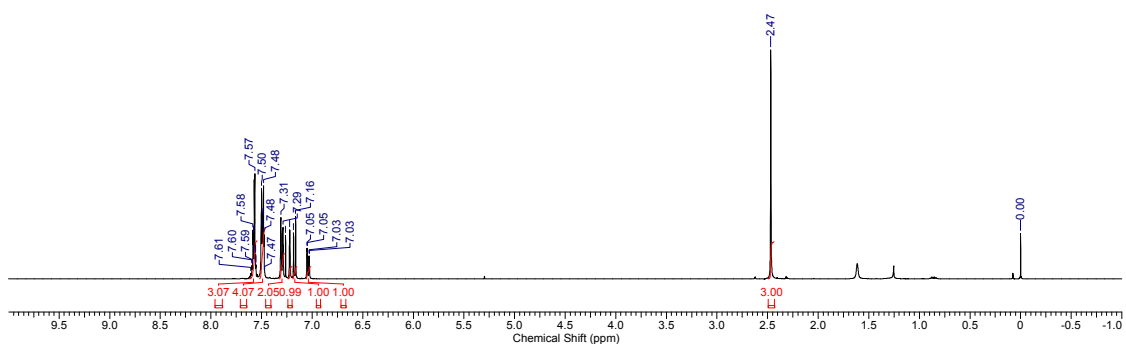

**Figure S52.**  $^1\text{H}$  NMR spectrum of compound **4q**

WXJ-255-13C,6121\_000001r

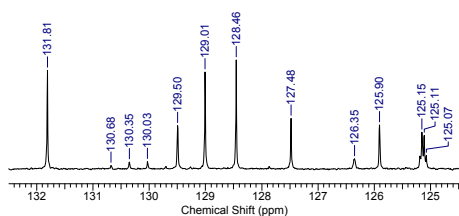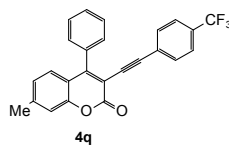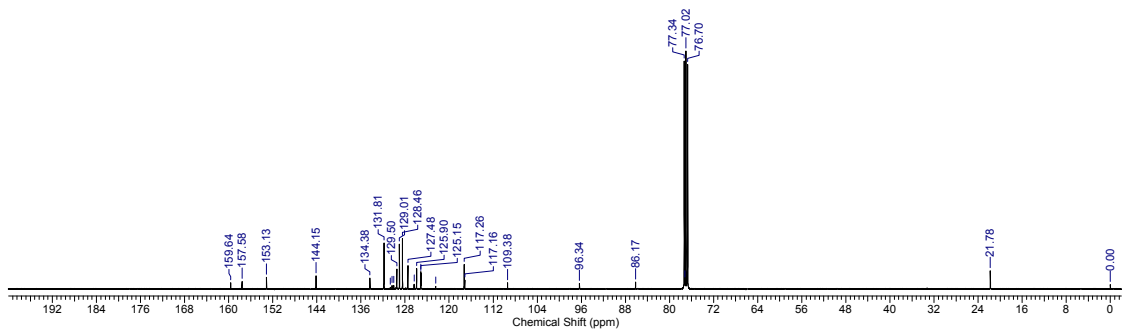

**Figure S53.**  $^{13}\text{C}$  NMR spectrum of compound **4q**

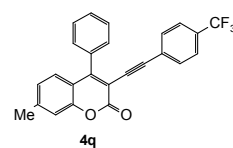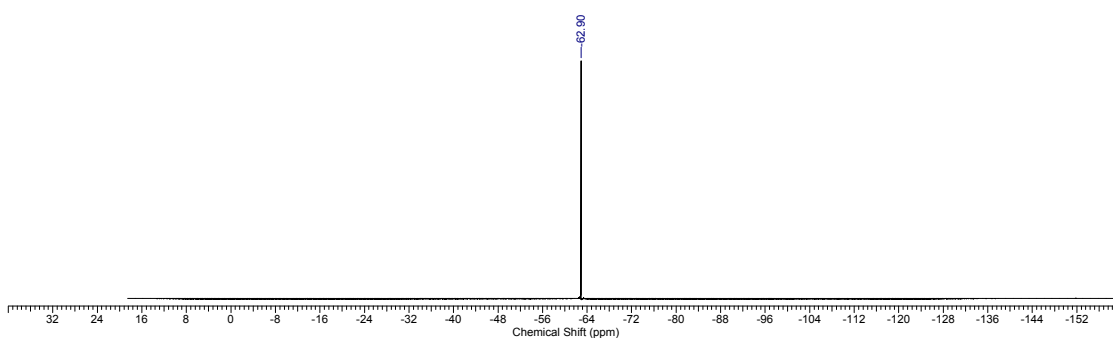Figure S54.  $^{19}\text{F}$  NMR spectrum of compound **4q**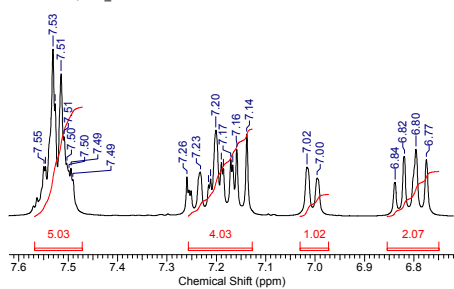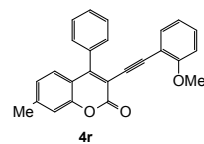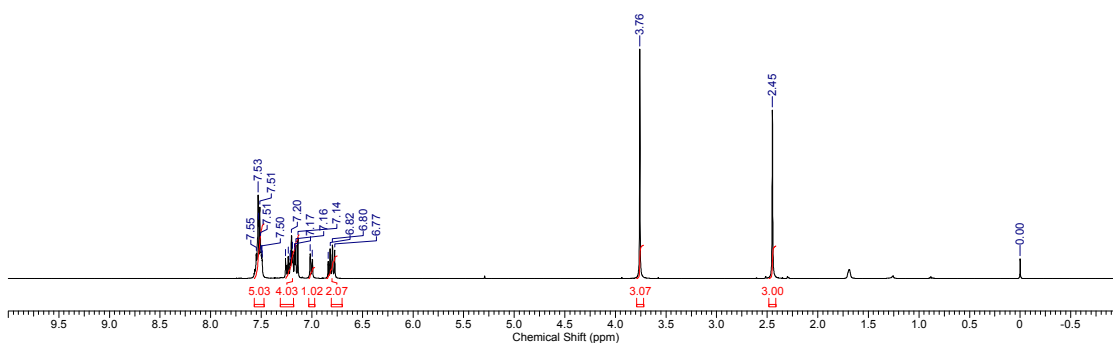Figure S55.  $^1\text{H}$  NMR spectrum of compound **4r**



WXJ-233-13C\_4921\_000001r

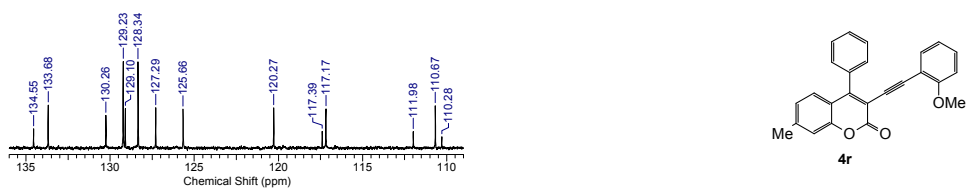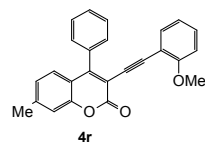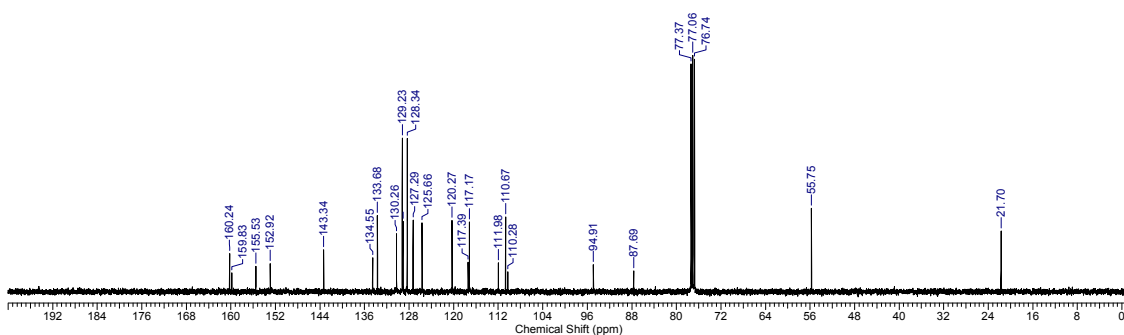

Figure S56. <sup>13</sup>C NMR spectrum of compound 4r

WXJ-161-1H\_2080\_000001r

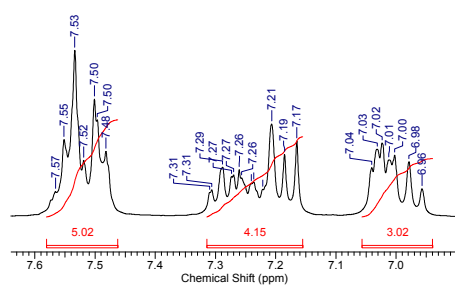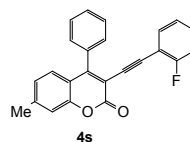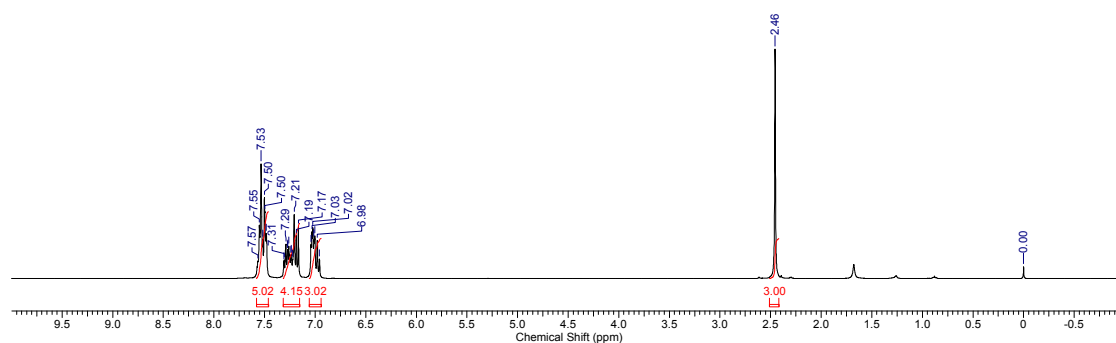

Figure S57. <sup>1</sup>H NMR spectrum of compound 4s

WXJ-161-19G,1671\_000001r

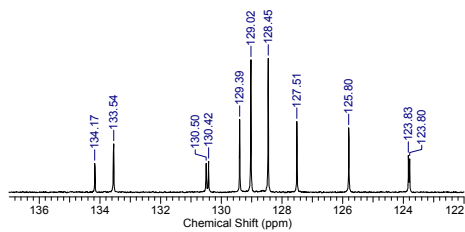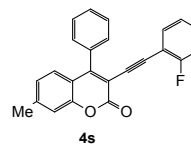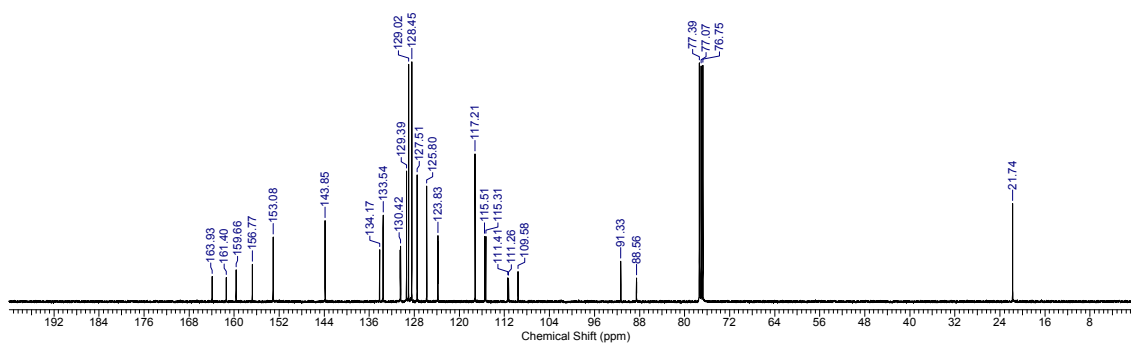

Figure S58. <sup>13</sup>C NMR spectrum of compound 4s

WXJ-161-19F,1672\_000001r

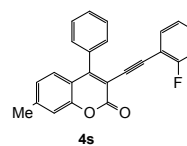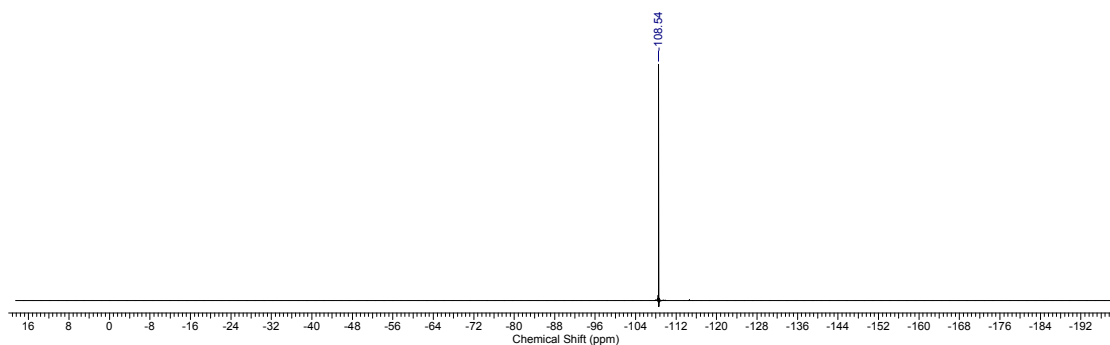

Figure S59. <sup>19</sup>F NMR spectrum of compound 4s

WXJ-263-1H,6760\_000001r

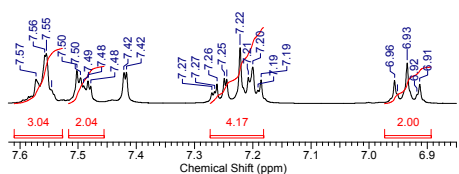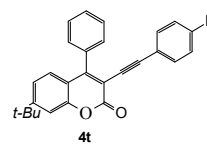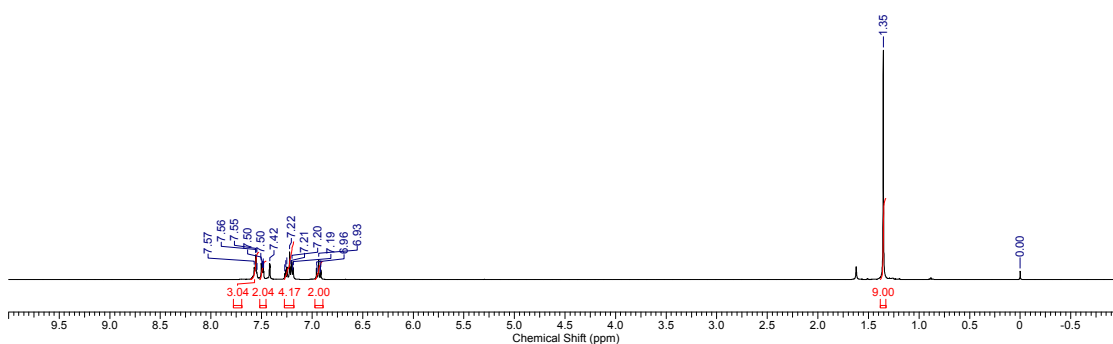

Figure S60.  $^1\text{H}$  NMR spectrum of compound **4t**

WXJ-263-13C,6751\_000001r

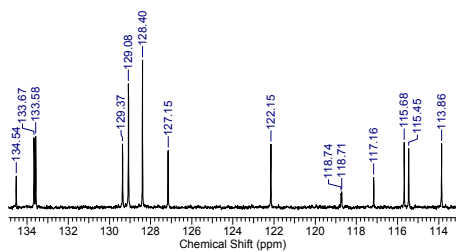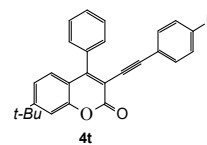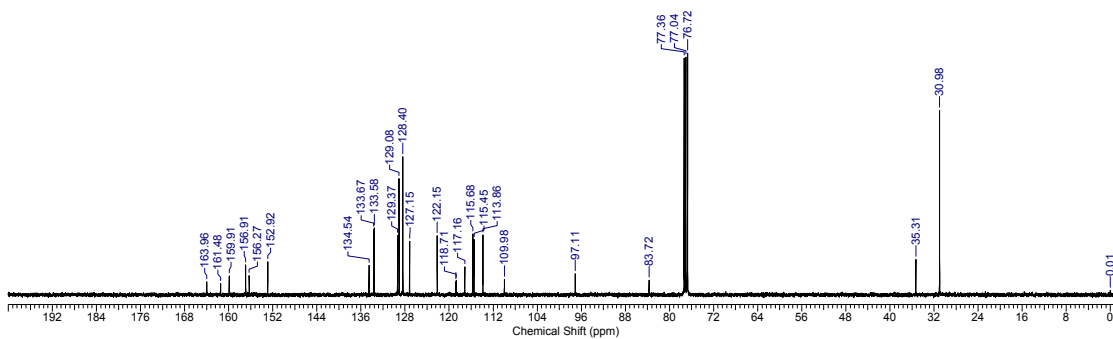

Figure S61.  $^{13}\text{C}$  NMR spectrum of compound **4t**

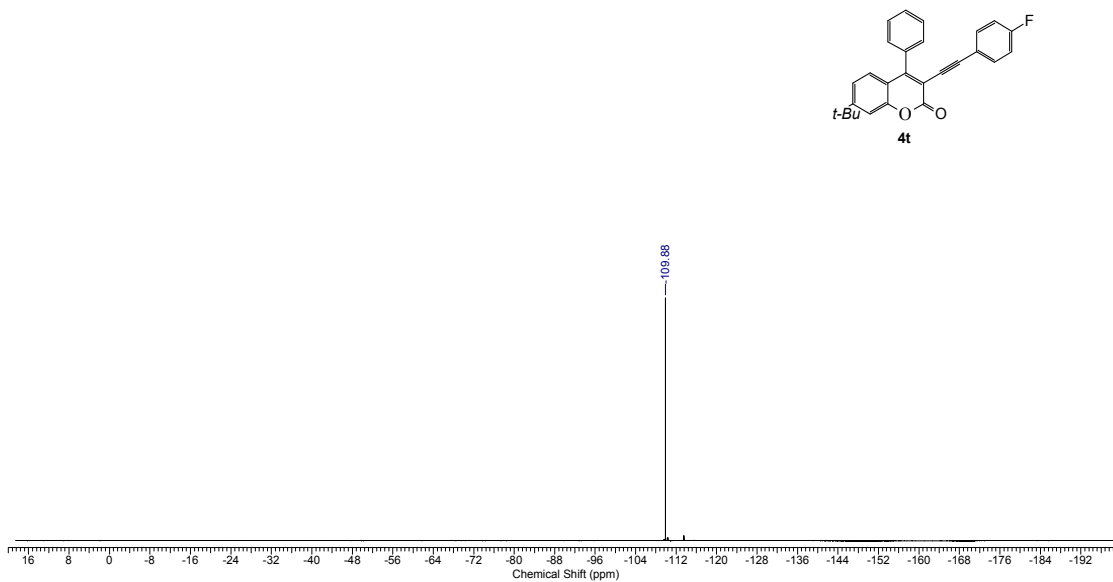Figure S62. <sup>19</sup>F NMR spectrum of compound **4t**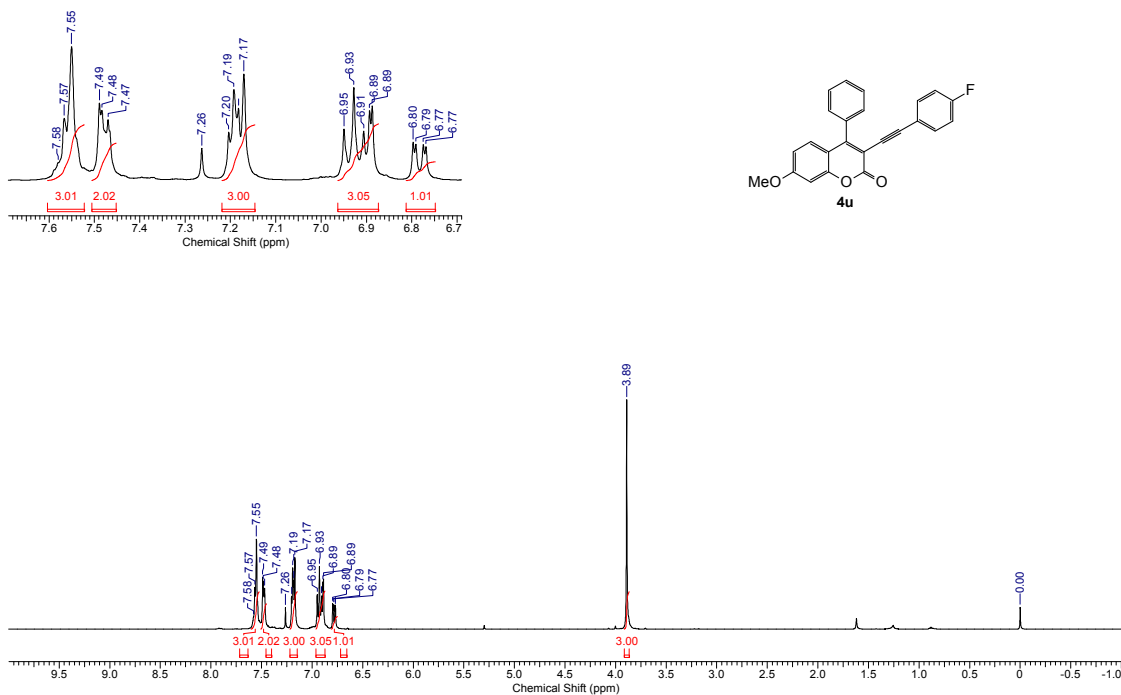Figure S63. <sup>1</sup>H NMR spectrum of compound **4u**

WXJ-259-13C,6611\_000001r

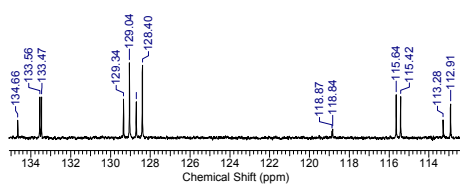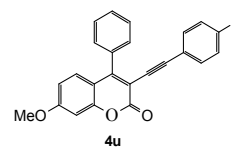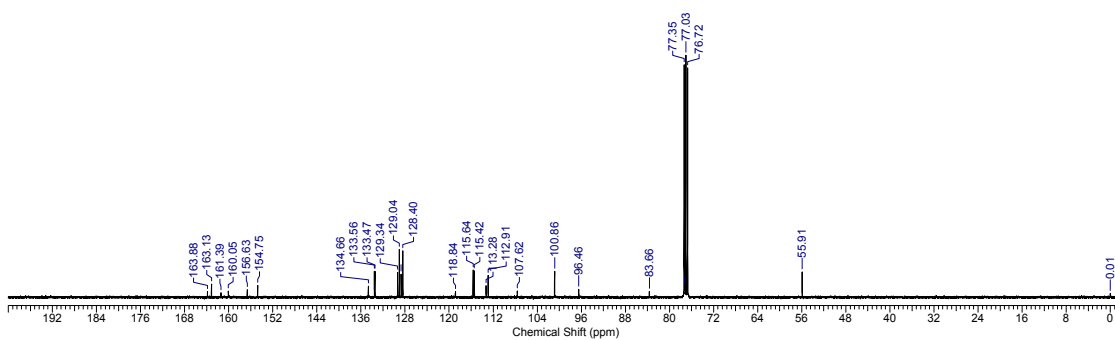

Figure S64.  $^{13}\text{C}$  NMR spectrum of compound **4u**

WXJ-259-19F,6612\_000001r

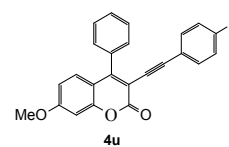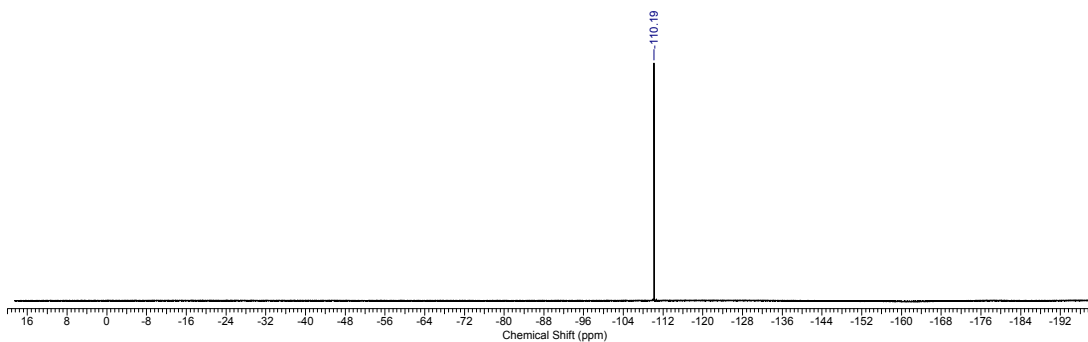

Figure S65.  $^{19}\text{F}$  NMR spectrum of compound **4u**

WXJ-258-1H,14520\_000001r

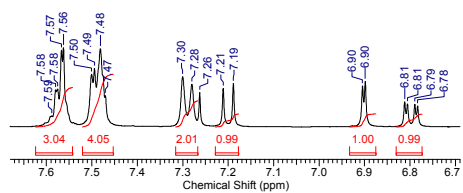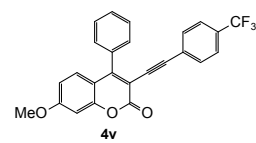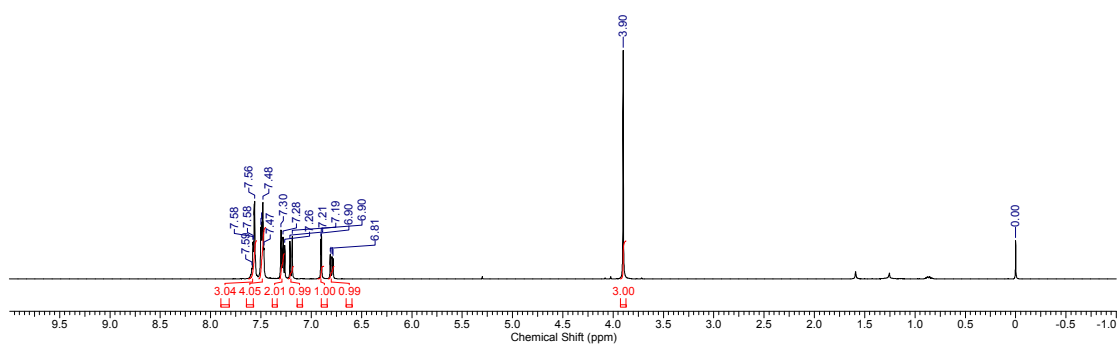

Figure S66. <sup>1</sup>H NMR spectrum of compound **4v**

WXJ-258-13C,6601\_000001r

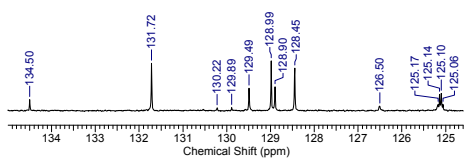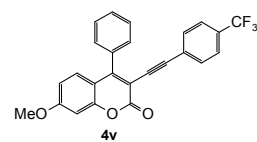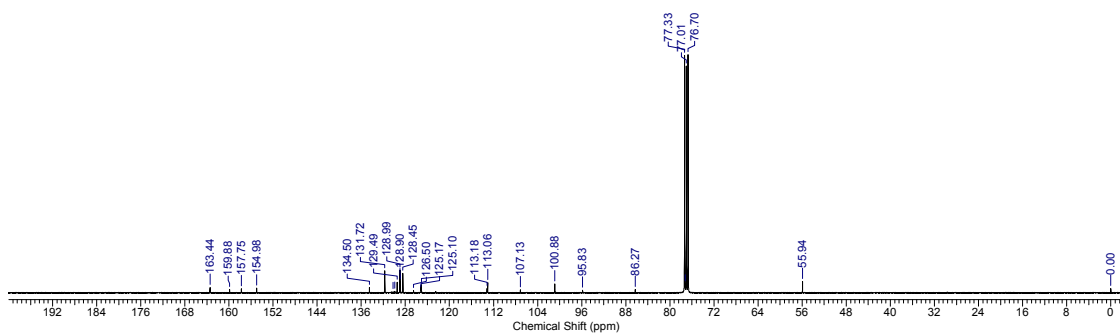

Figure S67. <sup>13</sup>C NMR spectrum of compound **4v**

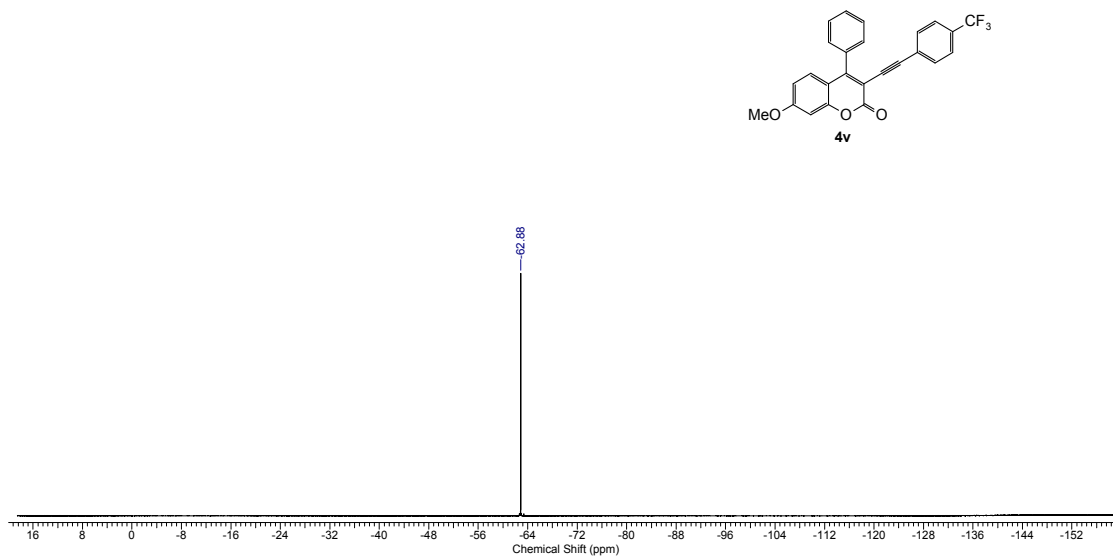Figure S68. <sup>19</sup>F NMR spectrum of compound **4v**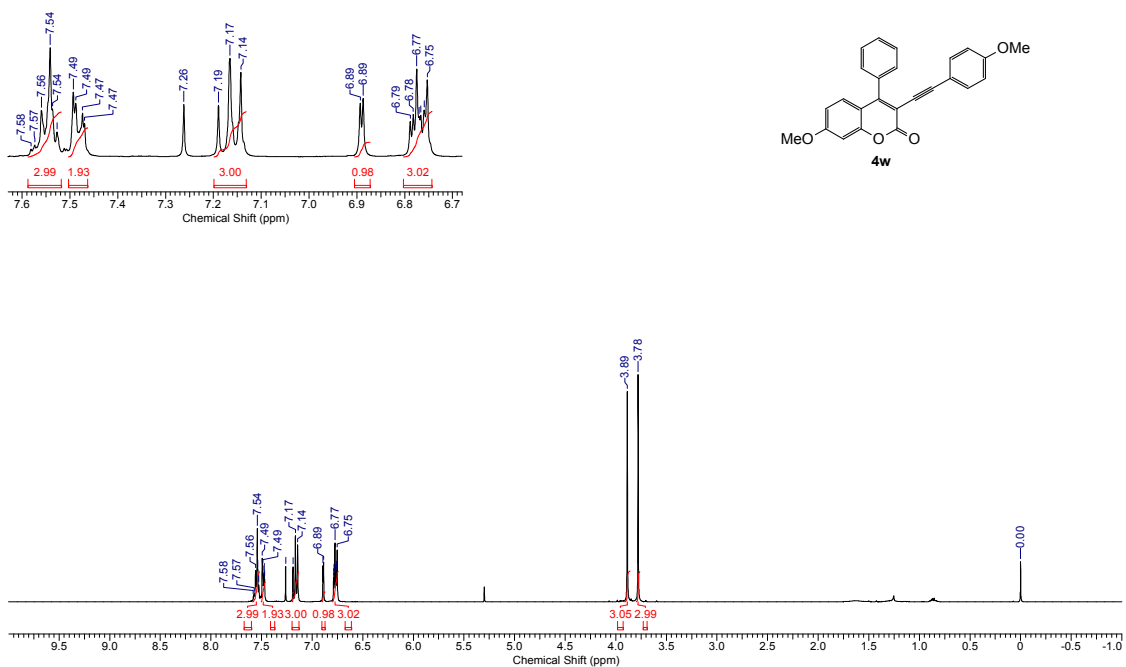Figure S69. <sup>1</sup>H NMR spectrum of compound **4w**

WXJ-260-13C,6621\_000001r

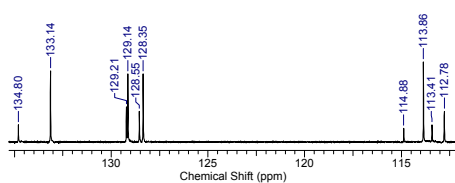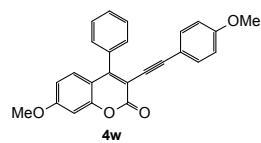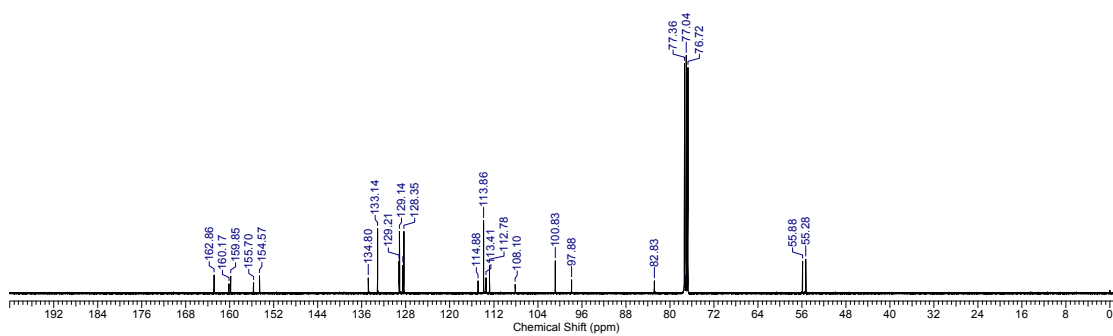

Figure S70. <sup>13</sup>C NMR spectrum of compound **4w**

WXJ-262-1H,6740\_000001r

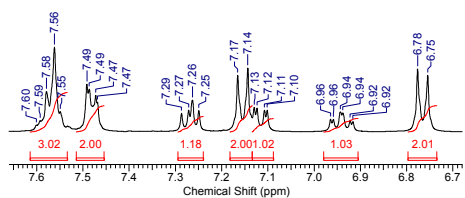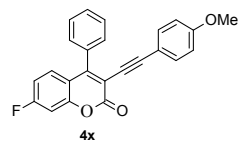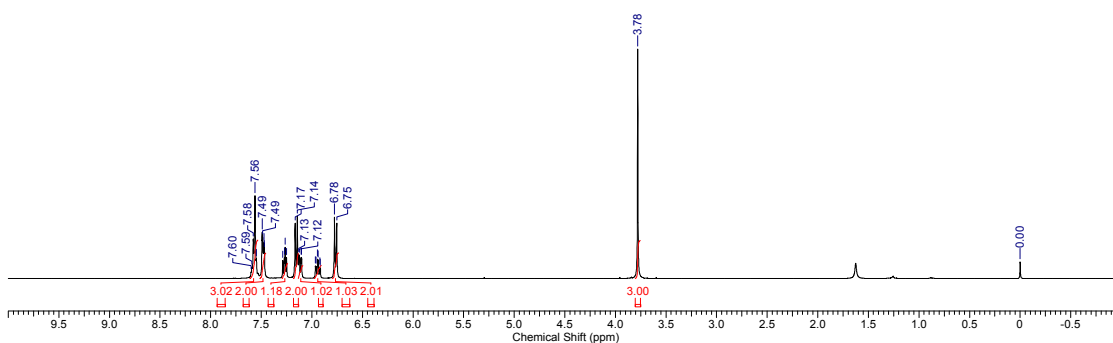

Figure S71. <sup>1</sup>H NMR spectrum of compound **4x**



WXJ-262-13C,6742\_000001r

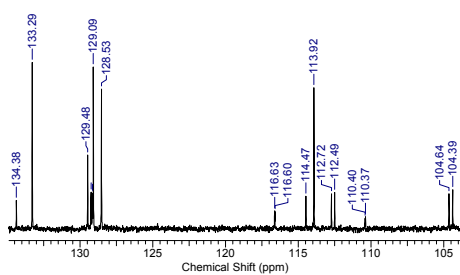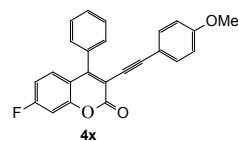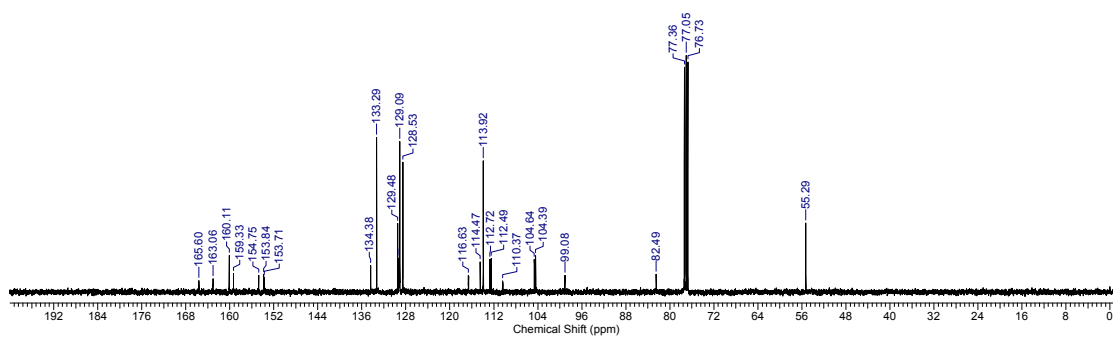

Figure S72. <sup>13</sup>C NMR spectrum of compound 4x

WXJ-262-19F,6741\_000001r

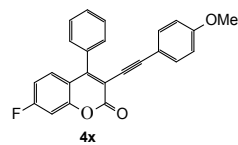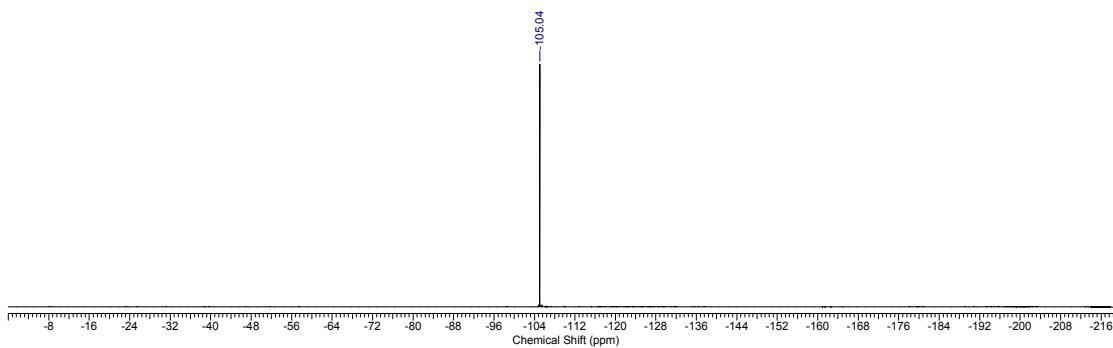

Figure S73. <sup>19</sup>F NMR spectrum of compound 4x

WXJ-261-1H,6730\_000001r

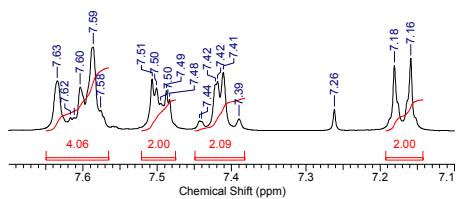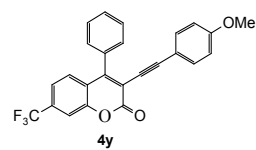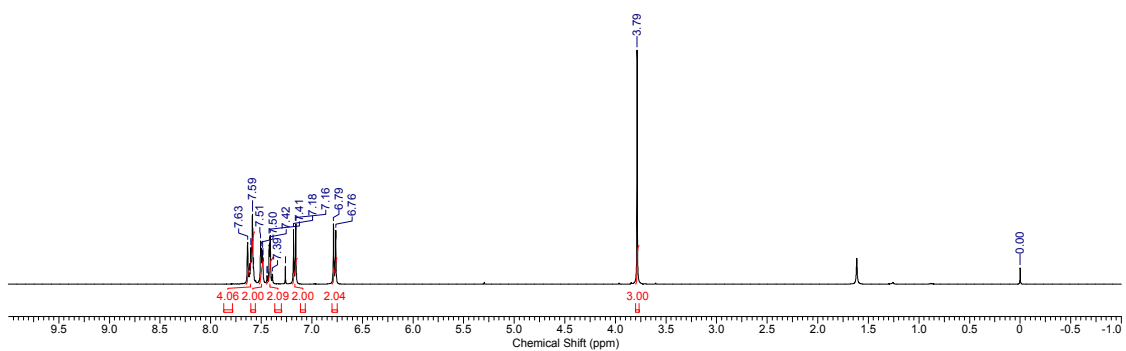

Figure S74. <sup>1</sup>H NMR spectrum of compound **4y**

WXJ-261-13C,6731\_000001r

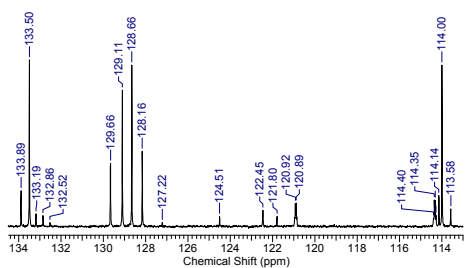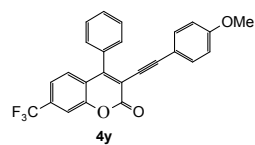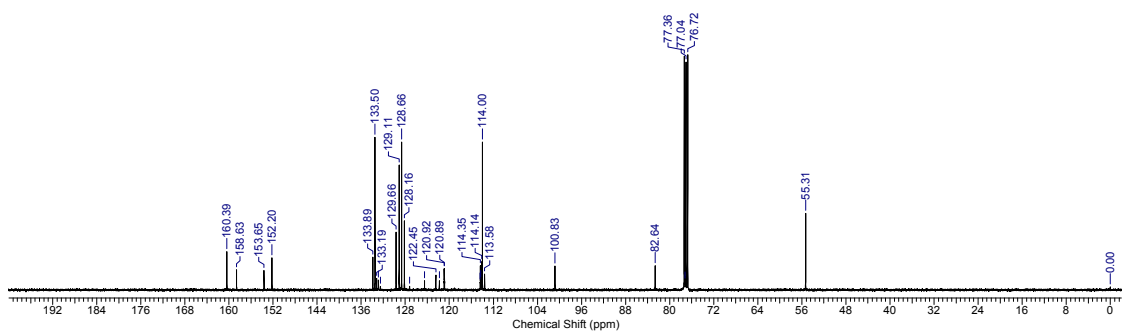

Figure S75. <sup>13</sup>C NMR spectrum of compound **4y**

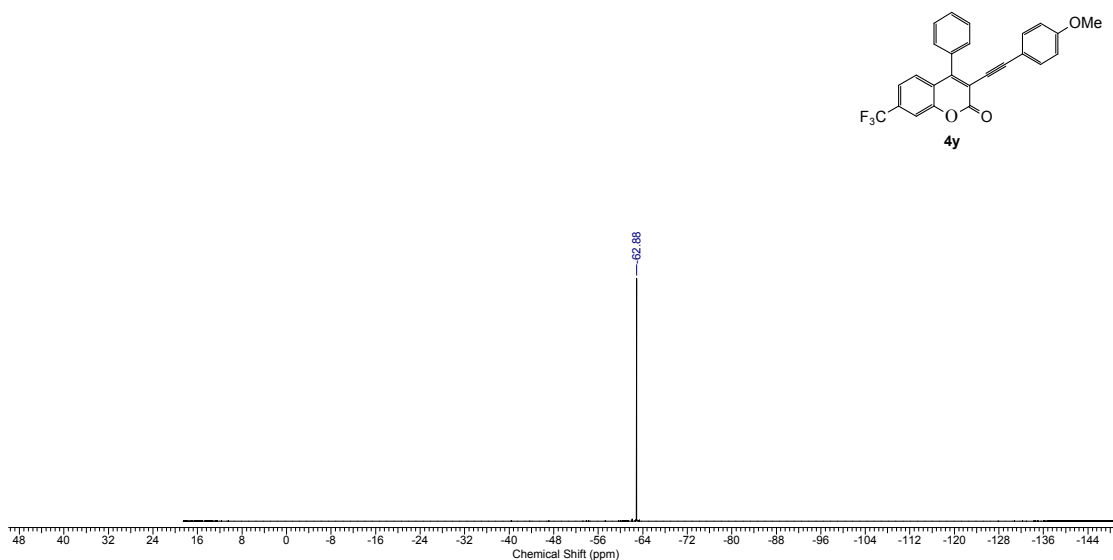

Figure S76.  $^{19}\text{F}$  NMR spectrum of compound **4y**

## 6. X-ray data

### 1) Structure determination of **4a**

The structure of **4a** was determined by the X-ray diffraction. Recrystallized from EtOH/dichloromethane (V/V = 1/1). Further information can be found in the CIF file. This crystal was deposited in the Cambridge Crystallographic Data Centre and assigned as CCDC 1881743.

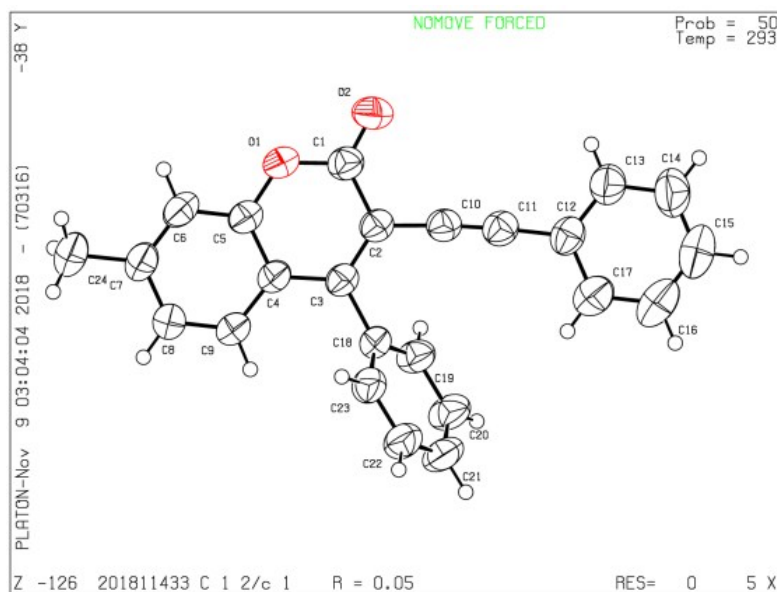

**Table S3. Crystal data and structure refinement for 4a.**

|                                             |                                                               |
|---------------------------------------------|---------------------------------------------------------------|
| Identification code                         | 201811433                                                     |
| Empirical formula                           | C <sub>24</sub> H <sub>16</sub> O <sub>2</sub>                |
| Formula weight                              | 336.37                                                        |
| Temperature/K                               | 293(2)                                                        |
| Crystal system                              | monoclinic                                                    |
| Space group                                 | C2/c                                                          |
| a/Å                                         | 29.831(4)                                                     |
| b/Å                                         | 11.1480(6)                                                    |
| c/Å                                         | 14.9443(19)                                                   |
| α/°                                         | 90                                                            |
| β/°                                         | 133.61(2)                                                     |
| γ/°                                         | 90                                                            |
| Volume/Å <sup>3</sup>                       | 3598.1(11)                                                    |
| Z                                           | 8                                                             |
| ρ <sub>calc</sub> /cm <sup>3</sup>          | 1.242                                                         |
| μ/mm <sup>-1</sup>                          | 0.617                                                         |
| F(000)                                      | 1408.0                                                        |
| Crystal size/mm <sup>3</sup>                | 0.2 × 0.16 × 0.14                                             |
| Radiation                                   | CuKα (λ = 1.54184)                                            |
| 2θ range for data collection/°              | 8.188 to 134.124                                              |
| Index ranges                                | -35 ≤ h ≤ 27, -8 ≤ k ≤ 13, -16 ≤ l ≤ 17                       |
| Reflections collected                       | 6687                                                          |
| Independent reflections                     | 3221 [R <sub>int</sub> = 0.0226, R <sub>sigma</sub> = 0.0294] |
| Data/restraints/parameters                  | 3221/0/237                                                    |
| Goodness-of-fit on F <sup>2</sup>           | 1.036                                                         |
| Final R indexes [I ≥ 2σ (I)]                | R <sub>1</sub> = 0.0480, wR <sub>2</sub> = 0.1334             |
| Final R indexes [all data]                  | R <sub>1</sub> = 0.0656, wR <sub>2</sub> = 0.1501             |
| Largest diff. peak/hole / e Å <sup>-3</sup> | 0.19/-0.19                                                    |

## 2) Structure determination of 4e

The structure of **4e** was determined by the X-ray diffraction. Recrystallized from EtOH/dichloromethane (V/V = 1/1). Further information can be found in the CIF file. This crystal was deposited in the Cambridge Crystallographic Data Centre and assigned as CCDC 1966836.

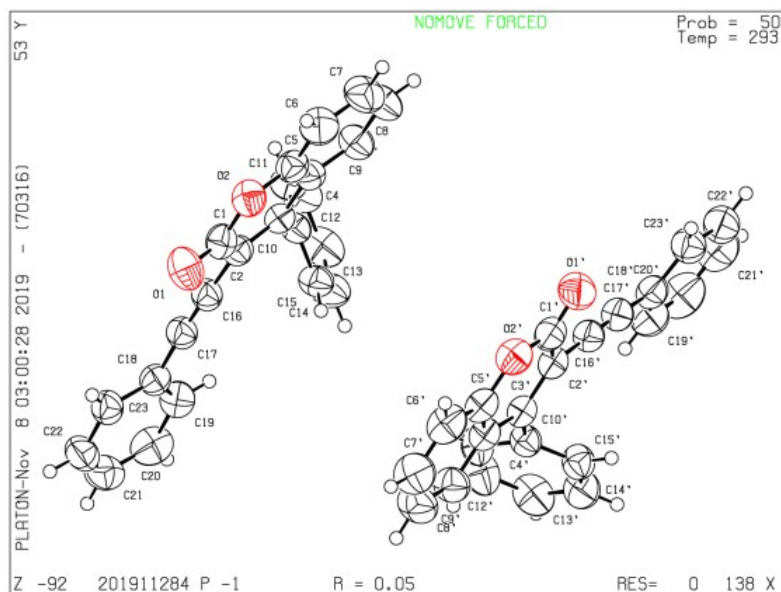

**Table S4. Crystal data and structure refinement for 4e.**

|                                    |                                                               |
|------------------------------------|---------------------------------------------------------------|
| Identification code                | 201911284                                                     |
| Empirical formula                  | C <sub>23</sub> H <sub>14</sub> O <sub>2</sub>                |
| Formula weight                     | 322.34                                                        |
| Temperature/K                      | 293(2)                                                        |
| Crystal system                     | triclinic                                                     |
| Space group                        | P-1                                                           |
| a/Å                                | 10.9195(8)                                                    |
| b/Å                                | 11.7513(7)                                                    |
| c/Å                                | 14.2060(6)                                                    |
| α/°                                | 87.690(5)                                                     |
| β/°                                | 77.763(5)                                                     |
| γ/°                                | 71.943(6)                                                     |
| Volume/Å <sup>3</sup>              | 1693.11(19)                                                   |
| Z                                  | 4                                                             |
| ρ <sub>calc</sub> /cm <sup>3</sup> | 1.265                                                         |
| μ/mm <sup>-1</sup>                 | 0.634                                                         |
| F(000)                             | 672.0                                                         |
| Crystal size/mm <sup>3</sup>       | 0.16 × 0.12 × 0.1                                             |
| Radiation                          | CuKα (λ = 1.54184)                                            |
| 2θ range for data collection/°     | 7.916 to 134.158                                              |
| Index ranges                       | -13 ≤ h ≤ 13, -14 ≤ k ≤ 13, -12 ≤ l ≤ 16                      |
| Reflections collected              | 11792                                                         |
| Independent reflections            | 5950 [R <sub>int</sub> = 0.0230, R <sub>sigma</sub> = 0.0328] |
| Data/restraints/parameters         | 5950/0/452                                                    |
| Goodness-of-fit on F <sup>2</sup>  | 1.018                                                         |
| Final R indexes [I ≥ 2σ (I)]       | R <sub>1</sub> = 0.0473, wR <sub>2</sub> = 0.1252             |

|                                                |                                  |
|------------------------------------------------|----------------------------------|
| Final R indexes [all data]                     | $R_1 = 0.0637$ , $wR_2 = 0.1428$ |
| Largest diff. peak/hole / $e \text{ \AA}^{-3}$ | 0.20/-0.16                       |

### 3) Structure determination of **4h**

The structure of **4h** was determined by the X-ray diffraction. Recrystallized from EtOH/dichloromethane (V/V = 1/1). Further information can be found in the CIF file. This crystal was deposited in the Cambridge Crystallographic Data Centre and assigned as CCDC 1966837.

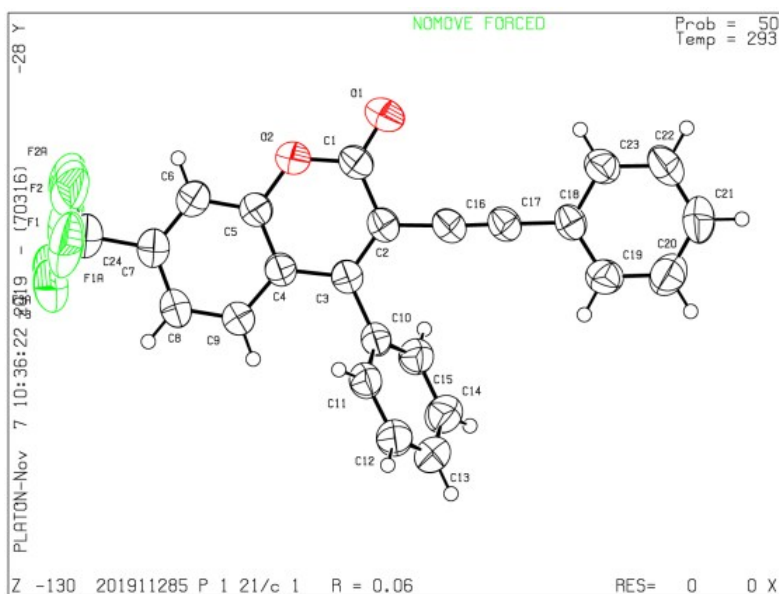

**Table S5. Crystal data and structure refinement for **4h**.**

|                                  |                               |
|----------------------------------|-------------------------------|
| Identification code              | 201911285                     |
| Empirical formula                | $C_{24}H_{13}F_3O_2$          |
| Formula weight                   | 390.34                        |
| Temperature/K                    | 293(2)                        |
| Crystal system                   | monoclinic                    |
| Space group                      | $P2_1/c$                      |
| $a/\text{\AA}$                   | 11.8769(8)                    |
| $b/\text{\AA}$                   | 11.8650(6)                    |
| $c/\text{\AA}$                   | 14.2912(11)                   |
| $\alpha/^\circ$                  | 90                            |
| $\beta/^\circ$                   | 110.026(8)                    |
| $\gamma/^\circ$                  | 90                            |
| Volume/ $\text{\AA}^3$           | 1892.2(2)                     |
| Z                                | 4                             |
| $\rho_{\text{calc}}/\text{cm}^3$ | 1.370                         |
| $\mu/\text{mm}^{-1}$             | 0.902                         |
| F(000)                           | 800.0                         |
| Crystal size/ $\text{mm}^3$      | $0.12 \times 0.11 \times 0.1$ |

|                                                |                                                                    |
|------------------------------------------------|--------------------------------------------------------------------|
| Radiation                                      | CuK $\alpha$ ( $\lambda = 1.54184$ )                               |
| 2 $\theta$ range for data collection/ $^\circ$ | 7.924 to 134.126                                                   |
| Index ranges                                   | $-14 \leq h \leq 13$ , $-14 \leq k \leq 10$ , $-17 \leq l \leq 16$ |
| Reflections collected                          | 7164                                                               |
| Independent reflections                        | 3371 [ $R_{\text{int}} = 0.0234$ , $R_{\text{sigma}} = 0.0304$ ]   |
| Data/restraints/parameters                     | 3371/67/273                                                        |
| Goodness-of-fit on $F^2$                       | 1.040                                                              |
| Final R indexes [ $I \geq 2\sigma(I)$ ]        | $R_1 = 0.0605$ , $wR_2 = 0.1653$                                   |
| Final R indexes [all data]                     | $R_1 = 0.0800$ , $wR_2 = 0.1862$                                   |
| Largest diff. peak/hole / $e \text{ \AA}^{-3}$ | 0.33/-0.44                                                         |

#### 4) Structure determination of **4n**

The structure of **4n** was determined by the X-ray diffraction. Recrystallized from EtOH/dichloromethane ( $V/V = 1/1$ ). Further information can be found in the CIF file. This crystal was deposited in the Cambridge Crystallographic Data Centre and assigned as CCDC 1966838.

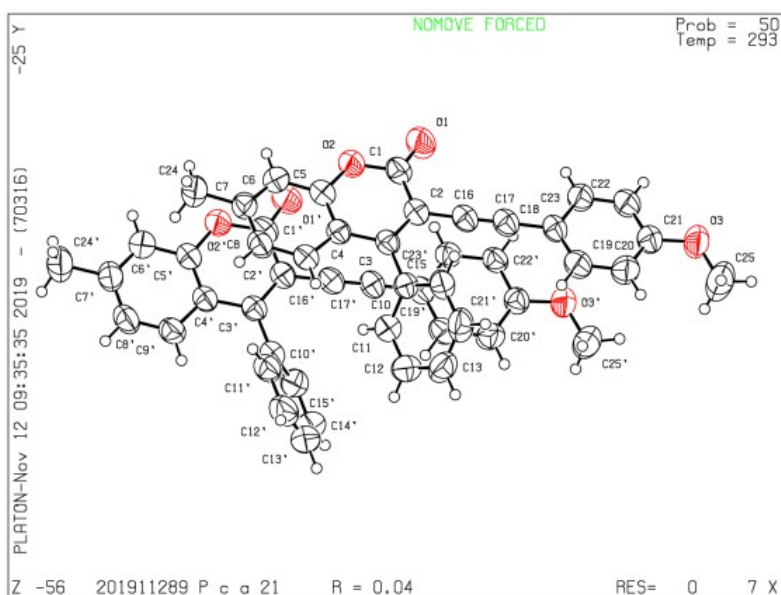

**Table S6. Crystal data and structure refinement for **4n**.**

|                     |                   |
|---------------------|-------------------|
| Identification code | 201911289         |
| Empirical formula   | $C_{25}H_{18}O_3$ |
| Formula weight      | 366.39            |
| Temperature/K       | 293(2)            |
| Crystal system      | orthorhombic      |
| Space group         | $Pca2_1$          |
| $a/\text{\AA}$      | 21.9993(4)        |
| $b/\text{\AA}$      | 12.5762(3)        |
| $c/\text{\AA}$      | 13.8028(3)        |
| $\alpha/^\circ$     | 90                |

|                                               |                                                               |
|-----------------------------------------------|---------------------------------------------------------------|
| $\beta/^\circ$                                | 90                                                            |
| $\gamma/^\circ$                               | 90                                                            |
| Volume/ $\text{\AA}^3$                        | 3818.78(14)                                                   |
| Z                                             | 8                                                             |
| $\rho_{\text{calc}}/\text{cm}^3$              | 1.275                                                         |
| $\mu/\text{mm}^{-1}$                          | 0.664                                                         |
| F(000)                                        | 1536.0                                                        |
| Crystal size/ $\text{mm}^3$                   | $0.1 \times 0.09 \times 0.08$                                 |
| Radiation                                     | CuK $\alpha$ ( $\lambda = 1.54184$ )                          |
| $2\Theta$ range for data collection/ $^\circ$ | 8.038 to 134.152                                              |
| Index ranges                                  | $-17 \leq h \leq 26, -15 \leq k \leq 14, -14 \leq l \leq 16$  |
| Reflections collected                         | 15382                                                         |
| Independent reflections                       | 6179 [ $R_{\text{int}} = 0.0275, R_{\text{sigma}} = 0.0319$ ] |
| Data/restraints/parameters                    | 6179/1/510                                                    |
| Goodness-of-fit on $F^2$                      | 1.022                                                         |
| Final R indexes [ $I \geq 2\sigma(I)$ ]       | $R_1 = 0.0422, wR_2 = 0.1094$                                 |
| Final R indexes [all data]                    | $R_1 = 0.0521, wR_2 = 0.1193$                                 |
| Largest diff. peak/hole / $e \text{\AA}^{-3}$ | 0.18/-0.13                                                    |
| Flack parameter                               | 0.2(3)                                                        |

### 5) Structure determination of **4x**

The structure of **4x** was determined by the X-ray diffraction. Recrystallized from EtOH/dichloromethane (V/V = 1/1). Further information can be found in the CIF file. This crystal was deposited in the Cambridge Crystallographic Data Centre and assigned as CCDC 1966843.

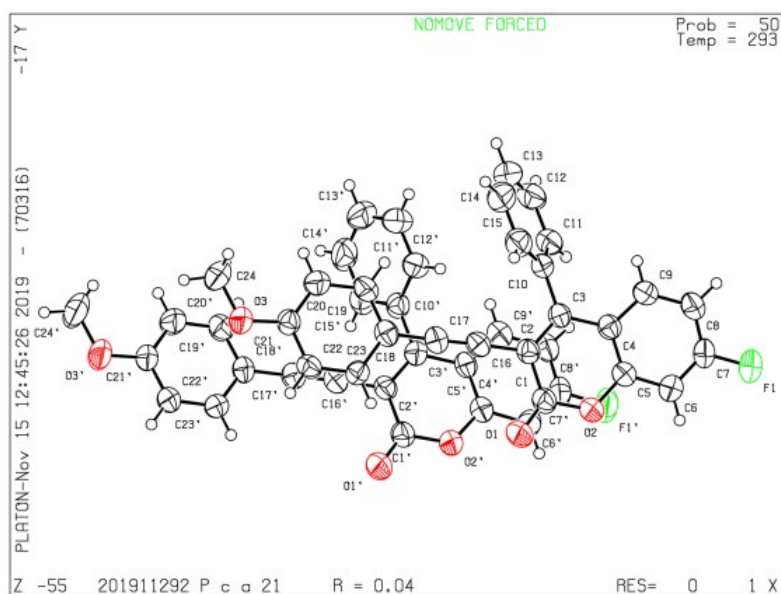

**Table S7. Crystal data and structure refinement for **4x**.**

|                     |           |
|---------------------|-----------|
| Identification code | 201911292 |
|---------------------|-----------|



|                                             |                                                               |
|---------------------------------------------|---------------------------------------------------------------|
| Empirical formula                           | C <sub>24</sub> H <sub>15</sub> FO <sub>3</sub>               |
| Formula weight                              | 370.36                                                        |
| Temperature/K                               | 293(2)                                                        |
| Crystal system                              | orthorhombic                                                  |
| Space group                                 | Pca2 <sub>1</sub>                                             |
| a/Å                                         | 21.9897(6)                                                    |
| b/Å                                         | 12.2777(3)                                                    |
| c/Å                                         | 13.5508(4)                                                    |
| α/°                                         | 90                                                            |
| β/°                                         | 90                                                            |
| γ/°                                         | 90                                                            |
| Volume/Å <sup>3</sup>                       | 3658.47(17)                                                   |
| Z                                           | 8                                                             |
| ρ <sub>calc</sub> /cm <sup>3</sup>          | 1.345                                                         |
| μ/mm <sup>-1</sup>                          | 0.782                                                         |
| F(000)                                      | 1536.0                                                        |
| Crystal size/mm <sup>3</sup>                | 0.16 × 0.13 × 0.1                                             |
| Radiation                                   | CuKα (λ = 1.54184)                                            |
| 2θ range for data collection/°              | 7.2 to 134.674                                                |
| Index ranges                                | -26 ≤ h ≤ 26, -13 ≤ k ≤ 14, -16 ≤ l ≤ 11                      |
| Reflections collected                       | 13127                                                         |
| Independent reflections                     | 4929 [R <sub>int</sub> = 0.0319, R <sub>sigma</sub> = 0.0371] |
| Data/restraints/parameters                  | 4929/1/508                                                    |
| Goodness-of-fit on F <sup>2</sup>           | 1.021                                                         |
| Final R indexes [I ≥ 2σ (I)]                | R <sub>1</sub> = 0.0421, wR <sub>2</sub> = 0.1018             |
| Final R indexes [all data]                  | R <sub>1</sub> = 0.0573, wR <sub>2</sub> = 0.1161             |
| Largest diff. peak/hole / e Å <sup>-3</sup> | 0.16/-0.15                                                    |
| Flack parameter                             | -0.15(18)                                                     |

---
